# Supplementary material for: Conserved Motifs and Domains in Members of Pospiviroidae
Source: MDPI journal article supplement (doi:10.3390/cells11020230), 2022-01-11
Supplement: s1 [file s1]

# Supplementary Materials: Conserved Motifs and Domains in Members of Pospiviroidae

Kevin-Phil Wüsthoff and Gerhard Steger

## List of Figures

|                                                                                                                                                |    |
|------------------------------------------------------------------------------------------------------------------------------------------------|----|
| S1. Illustration of parameters in the Wilbur–Lipman algorithm . . . . .                                                                        | 4  |
| S2. Examples for alignment between a candidate sequence and a seed alignment using JALI . . . . .                                              | 4  |
| S3. JALI output with CSVd as the candidate sequence and all other viroids presented in Keese and Symons (1985) as the seed alignment . . . . . | 5  |
| S4. Pairwise alignments of PSTVd to the other sequences used by Keese and Symons (1985) with NUCALN . . . . .                                  | 6  |
| S5. Dotplots between the sequences used by Keese and Symons (1985) . . . . .                                                                   | 9  |
| S6. Dotplots between consensus sequences of the species used by Keese and Symons (1985) . . . . .                                              | 11 |
| S7. MAFFT alignment between consensus sequences of <i>Pospiviroid</i> members . . . . .                                                        | 14 |
| S8. MAFFT alignment between sequences used in Keese and Symons (1987) . . . . .                                                                | 15 |
| S9. Overlay of dotplots from NUCALN alignments for all <i>Pospiviroid</i> members . . . . .                                                    | 17 |
| S10. MAFFT alignment between consensus sequences of <i>Apscaviroid</i> members . . . . .                                                       | 18 |
| S11. Consensus sequences and secondary structures of <i>Apscaviroid</i> members . . . . .                                                      | 19 |
| S12. Alignment of CDVd, ASSVd, and PBCVd. . . . .                                                                                              | 20 |
| S13. Similarity among <i>Pospiviroid</i> members . . . . .                                                                                     | 21 |
| S14. Similarity among <i>Apscaviroid</i> members . . . . .                                                                                     | 22 |
| S15. MAFFT alignment between the consensus sequences of <i>Coleviroid</i> members . . . . .                                                    | 23 |
| S16. Similarity among <i>Coleviroid</i> members . . . . .                                                                                      | 24 |
| S17. MAFFT alignment between members of genera <i>Cocad-</i> , <i>Pospi-</i> , and <i>Hostuviroid</i> . . . . .                                | 25 |
| S18. MAFFT alignment of DLVd, HSVd, and selected members of <i>Pospiviroid</i> . . . . .                                                       | 26 |
| S19. Similarity among DLVd, HSVd, and selected members of <i>Pospiviroid</i> . . . . .                                                         | 27 |
| S20. Sequence logo of “Terminal Conserved Region” (TCR) . . . . .                                                                              | 30 |
| S21. Sequence logo of “Terminal Conserved Hairpin” (TCH) . . . . .                                                                             | 30 |
| S22. Part of central domain including hairpin I (HPI) based on an alignment of 899 <i>Pospiviroid</i> sequences . . . . .                      | 31 |
| S23. Part of central domain including hairpin I (HPI) based on an alignment of 612 <i>Apscaviroid</i> sequences . . . . .                      | 32 |
| S24. LCCR of <i>Apscaviroid</i> members . . . . .                                                                                              | 32 |
| S25. Hairpin II (HP2) of <i>Pospiviroid</i> sequences . . . . .                                                                                | 33 |
| S26. RY motif of <i>Pospiviroid</i> sequences . . . . .                                                                                        | 34 |

## List of Tables

|                                                                                                                                                           |    |
|-----------------------------------------------------------------------------------------------------------------------------------------------------------|----|
| S1. Classification of viroids, viroid names and abbreviations . . . . .                                                                                   | 3  |
| S2. Pairwise sequence identity of the sequences used by Keese and Symons (1985) after alignment with NUCALN ( $k = 4$ and $g = 4$ ) . . . . .             | 12 |
| S3. Pairwise sequence identity of the sequences used by Keese and Symons (1985) after alignment with NUCALN with parameters $k = 3$ and $g = 3$ . . . . . | 13 |
| S4. Average pairwise sequence identity of consensus sequences of <i>Pospiviroid</i> species after alignment with MAFFT X-INS-I. . . . .                   | 16 |
| S5. Consistent domain borders of <i>Pospiviroid</i> members . . . . .                                                                                     | 28 |
| S6. Nomenclature for incompletely specified bases . . . . .                                                                                               | 29 |

## Modifications of CLUSTALΩ

In the file KTUPLE\_PAIR.C of CLUSTALΩ, lines 104–109 initialize the  $k$ -tuple pairwise alignment parameters [1]: length of  $k$ -tuples ( $k = \text{ktup}$ ), a score for gaps between  $k$ -tuple matches ( $g = \text{wind\_gap}$ ), number of  $k$ -tuple matches to call a diagonal significant ( $\text{signif}$ ), and window size ( $w = \text{window}$ ). For an illustration of the parameters see Figure S1.

```
104 const ktuple_param_t default_dna_param = {
105     .ktup = 3,
106     .wind_gap = 7,
107     .signif = 4,
108     .window = 20,
109 };
```

The shown values are those used in Wilbur and Lipman (1983) [1]; values given in [2] and [3] are  $g = 4$  and  $k = 4$ .

In the file KTUPLE\_PAIR.C of CLUSTALΩ, we added in the function KTUPLEPAIRDIST at line 777 the following code:

```
777 printf("Alignment: i=%d | j=%d \n", i, j);
778 int ii;
779 for(ii = 0; ii <= maxsf; ii++) {
780     printf("i=%3d;j=%3d;index=%3d;score=%3d\n",
781         accum[1][ii], accum[2][ii], accum[3][ii], accum[0][ii]);
782 }
783 printf("Top_Alignment: i=%d | j=%d \n", i, j);
784 ii = maxsf;
785 while (ii > 0) {
786     printf("i=%3d;j=%3d;index=%3d;score=%3d\n",
787         accum[1][ii], accum[2][ii], accum[3][ii], accum[0][ii]);
788     ii = accum[3][ii];
789 }
```

That is, after the function KTUPLEPAIRDIST has calculated the  $k$ -tuple coordinates and scores and saved them into the array “accum”, the additional code prints this information to STDOUT. The modified CLUSTALΩ source had to be configured and compiled with the option `--without-openmp` to suppress multithreading, as that would lead to results in unwanted order. The alignment example shown in [1] could be reproduced (not shown) with parameters as used in [1] and an appropriate PERL script, which converts the  $k$ -tuple coordinates into an alignment.

**Table S1.** Classification of viroids, viroid names and abbreviations. The manuscript handles only members of family *Pospiviroidae*.

| Family               | Genus               | Name                           | Abbreviation         |
|----------------------|---------------------|--------------------------------|----------------------|
| <i>Pospiviroidae</i> | <i>Pospiviroid</i>  | Potato spindle tuber           | PSTVd                |
|                      |                     | Chrysanthemum stunt            | CSVd                 |
|                      |                     | Citrus exocortis               | CEVd                 |
|                      |                     | Columnnea latent               | CLVd                 |
|                      |                     | Iresine                        | IrVd                 |
|                      |                     | Mexican papita                 | MPVd <sup>b</sup>    |
|                      |                     | Pepper chat fruit              | PCFVd                |
|                      |                     | Portulaca latent               | PoLVd <sup>a</sup>   |
|                      |                     | Tomato apical stunt            | TASVd                |
|                      |                     | Tomato chlorotic dwarf         | TCDVd                |
|                      | <i>Hostuviroid</i>  | Hop stunt                      | HSVd                 |
|                      |                     | Dahlia latent                  | DLVd                 |
|                      | <i>Cocadviroid</i>  | Coconut cadang-cadang          | CCCVd                |
|                      |                     | Citrus bark cracking           | CBCVd                |
|                      |                     | Coconut tinangaja              | CtiVd                |
|                      |                     | Hop latent                     | HLVd                 |
|                      | <i>Apscaviroid</i>  | Apple scar skin                | ASSVd                |
|                      |                     | Apple chlorotic fruit spot     | ACFSVd <sup>a</sup>  |
|                      |                     | Apple dimple fruit             | ADFVd                |
|                      |                     | Apple fruit crinkle            | AFCVd <sup>a</sup>   |
|                      |                     | Australian grapevine           | AGVd                 |
|                      |                     | Citrus bent leaf               | CBLVd                |
|                      |                     | Citrus dwarfing                | CDVd                 |
|                      |                     | Citrus viroid V                | CVd-V                |
|                      |                     | Citrus viroid VI               | CVd-VI               |
|                      |                     | Citrus viroid VII              | CVd-VII <sup>a</sup> |
|                      |                     | Dendrobium                     | DVd <sup>a</sup>     |
|                      |                     | Grapevine latent               | GLVd <sup>a</sup>    |
|                      |                     | Grapevine yellow speckle 1     | GYSVd-1              |
|                      |                     | Grapevine yellow speckle 2     | GYSVd-2              |
|                      |                     | Grapevine yellow speckle 3     | GYSVd-3 <sup>a</sup> |
|                      |                     | Lychee viroid-like RNA         | LVd <sup>a</sup>     |
|                      |                     | Pear blister canker            | PBCVd                |
|                      |                     | Persimmon                      | PVd <sup>a</sup>     |
|                      |                     | Persimmon 2                    | PVd-2 <sup>a</sup>   |
|                      |                     | Plum I                         | PIVd-I <sup>a</sup>  |
|                      | <i>Coleviroid</i>   | Coleus blumei-1                | CbVd-1               |
|                      |                     | Coleus blumei-2                | CbVd-2               |
|                      |                     | Coleus blumei-3                | CbVd-3               |
|                      |                     | Coleus blumei-4                | CbVd-4               |
|                      |                     | Coleus blumei-5                | CbVd-5 <sup>a</sup>  |
|                      |                     | Coleus blumei-6                | CbVd-6 <sup>a</sup>  |
|                      |                     | Coleus blumei-7                | CbVd-7 <sup>a</sup>  |
| <i>Avsunviroidae</i> | <i>Avsunviroid</i>  | Avocado sunblotch              | ASBVd                |
|                      | <i>Pelamoviroid</i> | Peach latent                   | PLMVd                |
|                      |                     | Chrysanthemum chlorotic mottle | CCMVd                |
|                      | <i>Elaviroid</i>    | Eggplant latent                | ELVd                 |

<sup>a</sup>Not approved by ICTV [4,5].<sup>b</sup>Includes Tomato planta macho viroid (TPMVd).

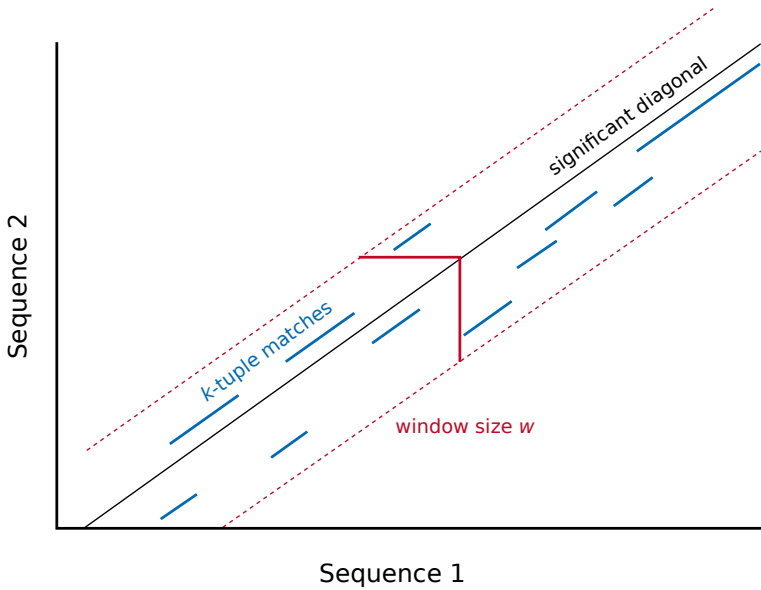

**Figure S1.** Illustration of parameters in the Wilbur-Lipman algorithm [1]. The black diagonal line marks the significant diagonal between the two sequences. The red dotted lines mark a distance of window size  $w$  around this diagonal in which matches are registered. The  $k$ -tuple matches (blue lines) are consecutive matches of a given length  $k$  between both sequences.

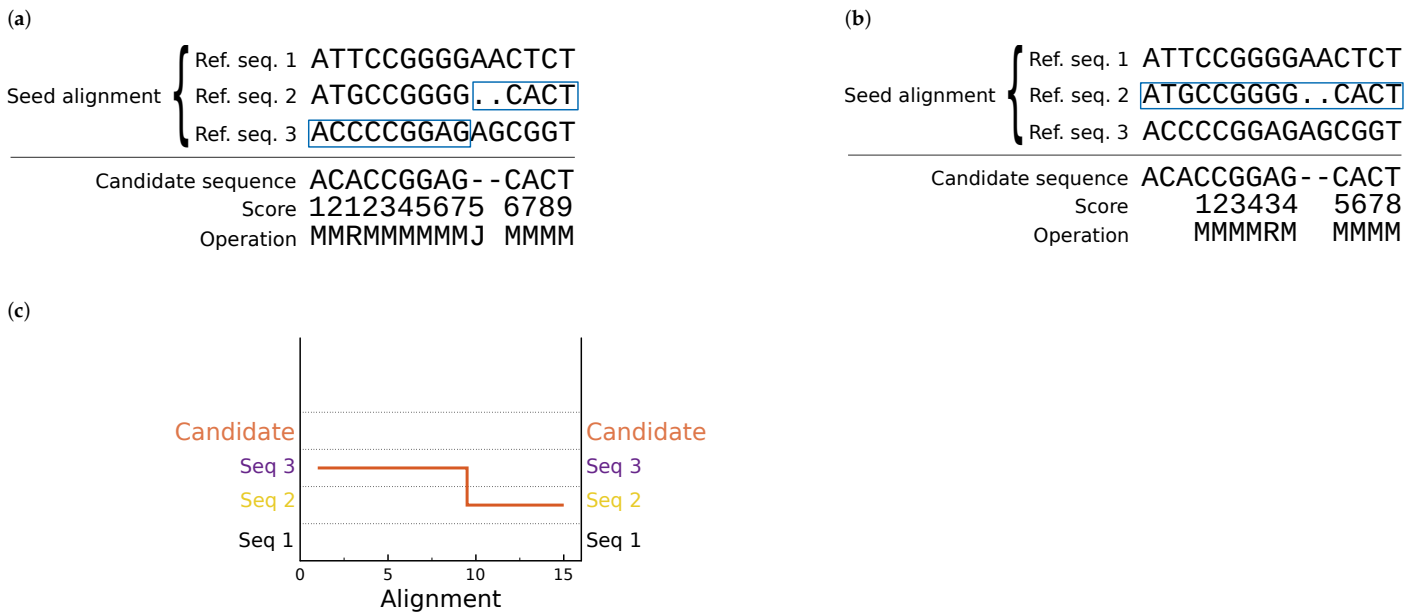

**Figure S2.** Examples for alignment between a candidate sequence and a seed alignment using JALI. Dots denote gaps in the seed alignment; dashes denote gaps introduced by JALI. A match (M) between two characters increases the score by  $m = 1$ , a replacement (R) reduces the score by  $r = -1$ , gap open and gap extension reduce the score by  $i = -2$  and  $e = -1$ , respectively. The blue outlines mark the reference sequence(s) or a part of it, to which JALI aligned the candidate sequence.

(a) A jump (J) is unfavorable with cost  $j = -2$ . Thus, JALI predicts an optimal score of 9 by aligning the first 9 nucleotides of the candidate sequence to reference sequence 3 of the seed alignment and then jumps to reference sequence 2 for the remaining part.

(b) A jump is unfavorable with cost  $j = -3$ . Thus, an optimal alignment is based only on reference sequence 2 without any jumps.

(c) Graphical representation of the alignment in (a). The candidate sequence is aligned first to reference sequence 3 and then to reference sequence 2. Note the identical color of label “Candidate” and the candidate’s line.

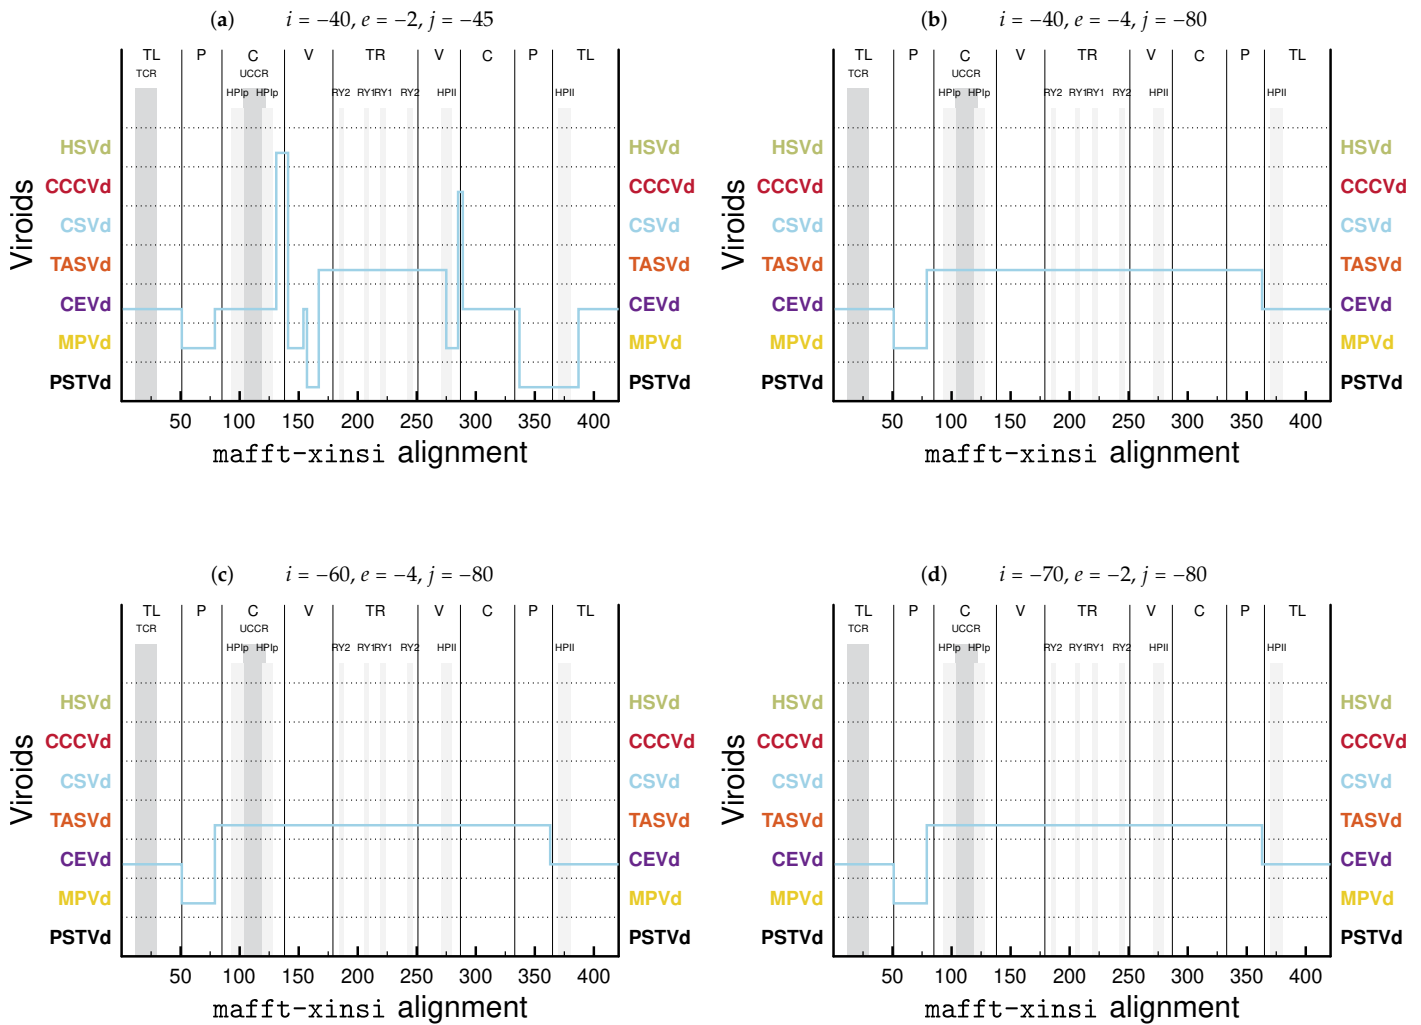

**Figure S3.** JALI output with CSVd as the candidate sequence and all other viroids presented in Keese and Symons (1985) as the seed alignment. Visualized output of JALI for CSVd (AC V01107) as candidate sequence and an alignment consisting of CCCVd (CCC), CEVd (CEV), HSVd (X00009=, MPVd (TPM), PSTVd (PTVA) and TASVd (TASCG) produced by MAFFT X-INS-I [6]. Domains are marked by black lines: TL = terminal left, P = pathogenicity, C = central, V = variable and TR = terminal right. Horizontal blue lines show where the candidate sequence is partially aligned to the corresponding sequence in the alignment; that is, the height of the blue line gives the sequence to which it is optimally aligned. Vertical blue lines show where JALI jumped between two sequences. Scoring parameters for JALI are given below the plots: gap open  $i$ , gap extension  $e$ , jump  $j$ . In (b)–(d), the CSVd sequence optimally aligns to upper and lower TL domain of the CEVd sequence, to upper P domain of MPVd, and to C, V, and lower P domain of the TASVd sequence.

## PSTVd (PTVA) vs. MPVd (TPM)

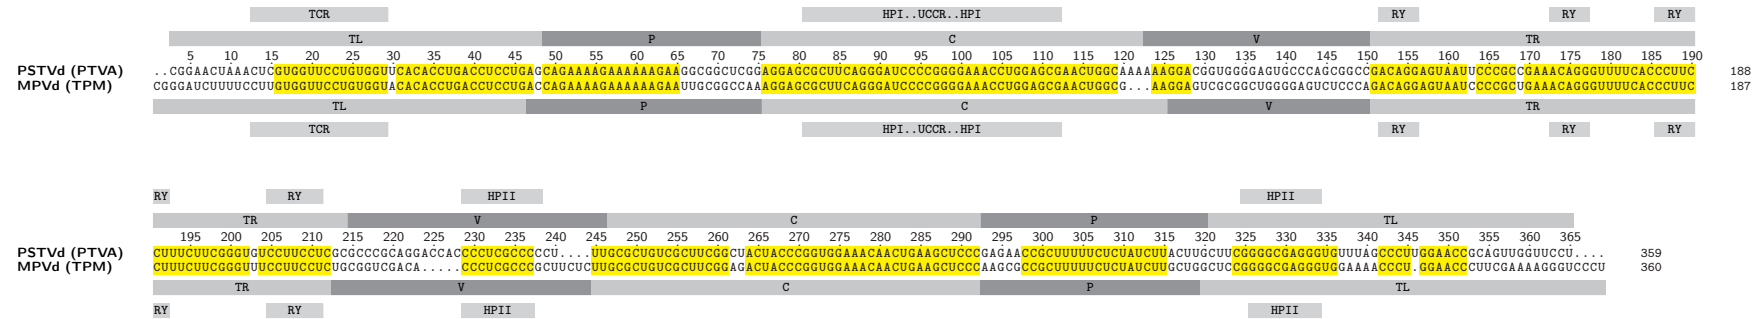

## PSTVd (PTVA) vs. CEVd (CEV)

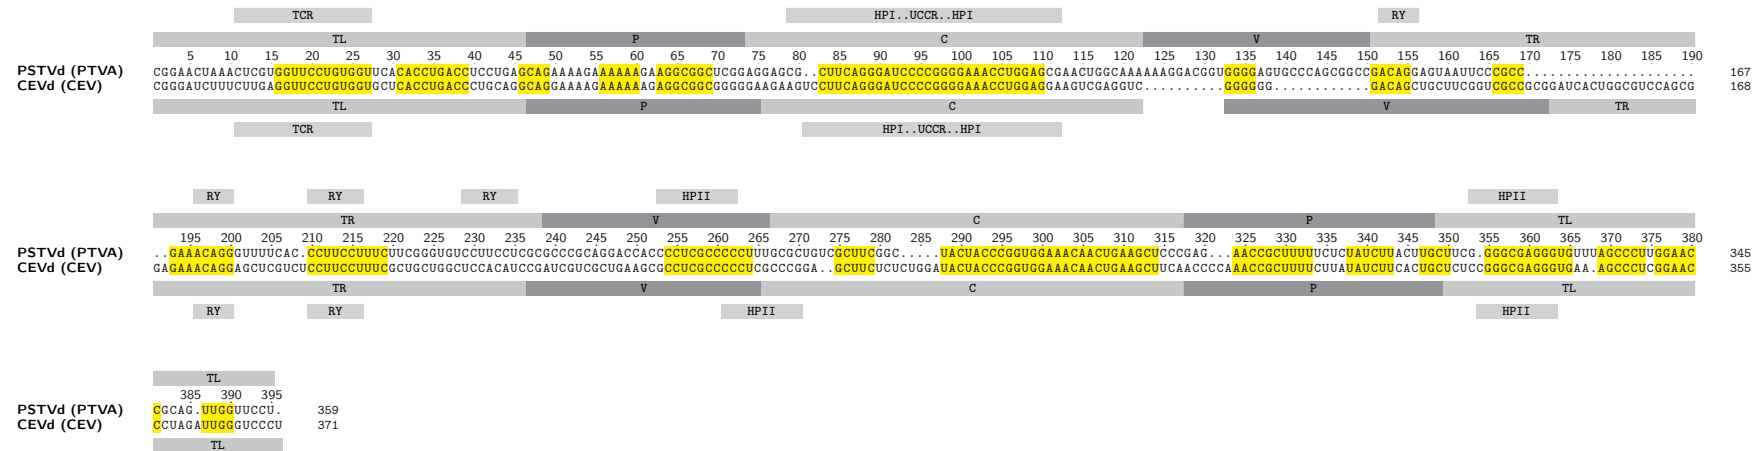

**Figure S4.** Pairwise alignments of PSTVd to the other sequences used by Keese and Symons (1985) with NUCALN. Figure is continued on pages S7–S8.

The viroid species name is followed by the GenBank Locus of the respective sequence. Alignments were calculated using NUCALN with  $k$ -tuple length  $k = 4$ , gap parameter  $g = 4$ , and window size  $w = 25$  (cf. Figure S1); these are the parameter combinations mentioned in McInnes and Symons [3]. Aligned regions are marked by yellow background. Alignments were drawn by  $\text{\texttt{TeXshade}}$  [7].

Boundaries of terminal left (TL), pathogenicity (P), central (C), variable (V) and terminal right (TR) domain are marked by bars directly above and below the two sequences at positions as given in [8]. Terminal conserved region (TCR, Figure S20), terminal conserved hairpin (TCH, Figure S21), hairpin I (HPI) plus upper central conserved region (UCCR, Figure 22(a)), hairpin II (HPIL, Figure S25), and purine-pyrimidine (RY, Figure S26) motifs are marked by bars at top and bottom of each sequence.

|               | TCR              |              |           |           |           |        |           |            |              |            | HPI..UCCR..HPI |               |              |           |         |          |         |                |                |            | RY         |       |        |         |        |       |         |       |       |       | RY    |     |       |     |     |     |     |     |     |     | RY |  |  |  |  |  |  |  |  |  |
|---------------|------------------|--------------|-----------|-----------|-----------|--------|-----------|------------|--------------|------------|----------------|---------------|--------------|-----------|---------|----------|---------|----------------|----------------|------------|------------|-------|--------|---------|--------|-------|---------|-------|-------|-------|-------|-----|-------|-----|-----|-----|-----|-----|-----|-----|----|--|--|--|--|--|--|--|--|--|
|               | TL               |              |           |           |           |        |           |            |              |            | P              |               |              |           |         |          |         |                |                |            | C          |       |        |         |        |       |         |       |       |       | V     |     |       |     |     |     |     |     |     |     | TR |  |  |  |  |  |  |  |  |  |
|               | 5                | 10           | 15        | 20        | 25        | 30     | 35        | 40         | 45           | 50         | 55             | 60            | 65           | 70        | 75      | 80       | 85      | 90             | 95             | 100        | 105        | 110   | 115    | 120     | 125    | 130   | 135     | 140   | 145   | 150   | 155   | 160 | 165   | 170 | 175 | 180 | 185 | 190 | 195 | 200 |    |  |  |  |  |  |  |  |  |  |
| PSTVd (PTVA)  | CGGAACUAAACUCUGU | GGUUCUCUGUGU | U         | CA        | CACCUGACC | UCCUGA | GCAGAA... | AAGAAAAAGA | AGGCGCUCGG   | AGGA       | GGC...         | CUUCAGGGAU    | CCCCGGGGA    | AAC       | CUGGAG  | CGAA     | CUGGCA  | AAAAAGG        | ACGGU          | GGG        | AGUG       | CCCA  | CGGGC  | ...     | GGAGAG | GUAAU | UCCCGCC | GAAAC | AGGGU | UUU   | CACCC | 185 |       |     |     |     |     |     |     |     |    |  |  |  |  |  |  |  |  |  |
| TASVd (TASCG) | CGGGAUCUUUCUGA   | GGUUCUCUGUGU | CCU       | CACCUGACC | CU...     | GCAG   | GCAUC     | AAGAAAAAGA | UAGGAGCGGA   | AGGA       | AGAA           | GUCU          | CAGGGAU      | CCCCGGGGA | AAC     | CUGGAG   | GAA     | GUC            | AGG            | GGG        | GUUC       | CGGAU | UUCU   | CGGUUGA | ...    | GGGAG | GUAAU   | CCCA  | GC    | GAAAC | AGGGU | UUU | CACCC | 186 |     |     |     |     |     |     |    |  |  |  |  |  |  |  |  |  |
|               | TL               |              |           |           |           |        |           |            |              |            | P              |               |              |           |         |          |         |                |                |            | C          |       |        |         |        |       |         |       |       |       | V     |     |       |     |     |     |     |     |     |     | TR |  |  |  |  |  |  |  |  |  |
|               | TCR              |              |           |           |           |        |           |            |              |            | HPI..UCCR..HPI |               |              |           |         |          |         |                |                |            | RY         |       |        |         |        |       |         |       |       |       | RY    |     |       |     |     |     |     |     |     |     | RY |  |  |  |  |  |  |  |  |  |
|               | RY               |              |           |           |           |        |           |            |              |            | RY             |               |              |           |         |          |         |                |                |            | HPII       |       |        |         |        |       |         |       |       |       | HPII  |     |       |     |     |     |     |     |     |     | TL |  |  |  |  |  |  |  |  |  |
|               | 205              | 210          | 215       | 220       | 225       | 230    | 235       | 240        | 245          | 250        | 255            | 260           | 265          | 270       | 275     | 280      | 285     | 290            | 295            | 300        | 305        | 310   | 315    | 320     | 325    | 330   | 335     | 340   | 345   | 350   | 355   | 360 | 365   | 370 | 375 | 380 | 385 |     |     |     |    |  |  |  |  |  |  |  |  |  |
| PSTVd (PTVA)  | UUCCUUUCU        | UGGGUUG      | UCCUUCUCU | CGCC      | CGCAGG    | ACCAC  | ...       | CCUCUGCCC  | CCUUGGCGUCUG | CCUUCGGCUG | ...            | ACUACCGGGUGG  | AAACAAC      | GAAGAG    | CCCGAGA | ACCG     | ...     | CUUUUUCUCUAUCU | ACUUGCUCUG     | GGGGGAGGGU | GUU        | AGCCU | UGGAAC | CGAGU   | UGGU   | UCCU  | 359     |       |       |       |       |     |       |     |     |     |     |     |     |     |    |  |  |  |  |  |  |  |  |  |
| TASVd (TASCG) | UUCCUUUCU        | UGGUUGU      | UCCUUCUCU | CGCC      | CGGAGG    | UCUUGC | ...       | CCUCUGCCC  | GGA          | ...        | ...            | GCUCUCUCUGGAG | ACUACCGGGUGG | AAACAAC   | GAAGAG  | UCCCAUCU | CCAGCUG | ...            | CUUUUUCUCUAUCU | UGUUGCUCUC | GGGGGAGGGU | AA    | AGCCU  | UGGAAC  | CUGAA  | UGGU  | CCCU    | 360   |       |       |       |     |       |     |     |     |     |     |     |     |    |  |  |  |  |  |  |  |  |  |
|               | TR               |              |           |           |           |        |           |            |              |            | V              |               |              |           |         |          |         |                |                |            | C          |       |        |         |        |       |         |       |       |       | P     |     |       |     |     |     |     |     |     |     | TL |  |  |  |  |  |  |  |  |  |
|               | RY               |              |           |           |           |        |           |            |              |            | RY             |               |              |           |         |          |         |                |                |            | HPII       |       |        |         |        |       |         |       |       |       | HPII  |     |       |     |     |     |     |     |     |     | TL |  |  |  |  |  |  |  |  |  |

**PSTVd (PTVa)**  
**CSVd (V01107)**

TCR: 5 10 15 20 25 30 35 40 45 50 55 60 65 70 75 80 85 90 95 100 105 110 115 120 125 130 135 140 145 150 155 160 165 170 175 180 185 190 195 200

HPI..UCR..HPI: C 100 105 110 115 120 125 130 135 140 145 150 155 160 165 170 175 180 185 190 195 200

RY: 155 160 165 170 175 180 185 190 195 200

TR: 155 160 165 170 175 180 185 190 195 200

Sequence alignment (top):  
 CGGAACUAAACUCUGGUUCCUGUGGUUCACACUGAGCCUCCUGAGCAGAAAGAAAAAGAAAGGCCUCCUGGAGGAGCGCUUCAGGGAUCCCGGGGAAACUGGAGCGAACUGGCAAAAGGACGGUGGGAGUG...CCGAGCGGCC...GACAGGAGUAAUCCCGCCGAAACAGGGUUUUCACCCUCCUUUC  
 .CGGACUUAUACUUGGUUCCUGUGGUUGCACACUGAGCCUCCUGCUGUAAGCAAAAGAAAAAGAAAGGCCGGAAGAAGUCCUUCAGGGAUCCCGGGGAAACUGGAGGAGGAAGUCCGACGACGAUCGCGGUGUGGCGCUUAAGACCCACUCCUCCGAGACAGGAGUAAUCCU...AAACAGGGUUUUCACCCUCCUUUA

TCR: 155 160 165 170 175 180 185 190 195 200

HPI..UCR..HPI: C 100 105 110 115 120 125 130 135 140 145 150 155 160 165 170 175 180 185 190 195 200

RY: 155 160 165 170 175 180 185 190 195 200

TR: 155 160 165 170 175 180 185 190 195 200

Sequence alignment (bottom):  
 UUCGCGUGUCCUUCUGGCGGCGCGCAGGAACAC..CCUCCGCCCCUUUGCGCUGUCCUUC...GGCUACUACCCGGGUGGAAACAACAUGAACCGCCGAGAAACCCGUUUUUCUUAUCUUAUCUUGCUUCGCGGCAGGGUGUUUAGCCCUUGAAGCGGCAUUG..GUUCGU..  
 GUU...UCCUUCUGUCCUGGAGAGGUUUCUUGCCCUUAGCCGCGUUCUGAA...GUCCUUGUGGCUACUACCCGGUGGAAACAACAUGAACCUUACAACCGCU...UUUUUUUCUUAACCUUUCUUAAGCAACCGGCCAGGGAG..UUAGCCGUUGGAACCUUAGUAUUUGUCCCU

RY: 155 160 165 170 175 180 185 190 195 200

HPII: 155 160 165 170 175 180 185 190 195 200

C: 100 105 110 115 120 125 130 135 140 145 150 155 160 165 170 175 180 185 190 195 200

P: 100 105 110 115 120 125 130 135 140 145 150 155 160 165 170 175 180 185 190 195 200

TL: 155 160 165 170 175 180 185 190 195 200

RY: 155 160 165 170 175 180 185 190 195 200

HPII: 155 160 165 170 175 180 185 190 195 200

C: 100 105 110 115 120 125 130 135 140 145 150 155 160 165 170 175 180 185 190 195 200

P: 100 105 110 115 120 125 130 135 140 145 150 155 160 165 170 175 180 185 190 195 200

TL: 155 160 165 170 175 180 185 190 195 200

RY: 155 160 165 170 175 180 185 190 195 200

HPII: 155 160 165 170 175 180 185 190 195 200

C: 100 105 110 115 120 125 130 135 140 145 150 155 160 165 170 175 180 185 190 195 200

P: 100 105 110 115 120 125 130 135 140 145 150 155 160 165 170 175 180 185 190 195 200

TL: 155 160 165 170 175 180 185 190 195 200

RY: 155 160 165 170 175 180 185 190 195 200

HPII: 155 160 165 170 175 180 185 190 195 200

C: 100 105 110 115 120 125 130 135 140 145 150 155 160 165 170 175 180 185 190 195 200

P: 100 105 110 115 120 125 130 135 140 145 150 155 160 165 170 175 180 185 190 195 200

TL: 155 160 165 170 175 180 185 190 195 200

RY: 155 160 165 170 175 180 185 190 195 200

HPII: 155 160 165 170 175 180 185 190 195 200

C: 100 105 110 115 120 125 130 135 140 145 150 155 160 165 170 175 180 185 190 195 200

P: 100 105 110 115 120 125 130 135 140 145 150 155 160 165 170 175 180 185 190 195 200

TL: 155 160 165 170 175 180 185 190 195 200

RY: 155 160 165 170 175 180 185 190 195 200

HPII: 155 160 165 170 175 180 185 190 195 200

C: 100 105 110 115 120 125 130 135 140 145 150 155 160 165 170 175 180 185 190 195 200

P: 100 105 110 115 120 125 130 135 140 145 150 155 160 165 170 175 180 185 190 195 200

TL: 155 160 165 170 175 180 185 190 195 200

RY: 155 160 165 170 175 180 185 190 195 200

HPII: 155 160 165 170 175 180 185 190 195 200

C: 100 105 110 115 120 125 130 135 140 145 150 155 160 165 170 175 180 185 190 195 200

P: 100 105 110 115 120 125 130 135 140 145 150 155 160 165 170 175 180 185 190 195 200

TL: 155 160 165 170 175 180 185 190 195 200

RY: 155 160 165 170 175 180 185 190 195 200

HPII: 155 160 165 170 175 180 185 190 195 200

C: 100 105 110 115 120 125 130 135 140 145 150 155 160 165 170 175 180 185 190 195 200

P: 100 105 110 115 120 125 130 135 140 145 150 155 160 165 170 175 180 185 190 195 200

TL: 155 160 165 170 175 180 185 190 195 200

RY: 155 160 165 170 175 180 185 190 195 200

HPII: 155 160 165 170 175 180 185 190 195 200

C: 100 105 110 115 120 125 130 135 140 145 150 155 160 165 170 175 180 185 190 195 200

P: 100 105 110 115 120 125 130 135 140 145 150 155 160 165 170 17

S7 of S35

PSTVd (PTVA) vs. CCCVd (CCC)

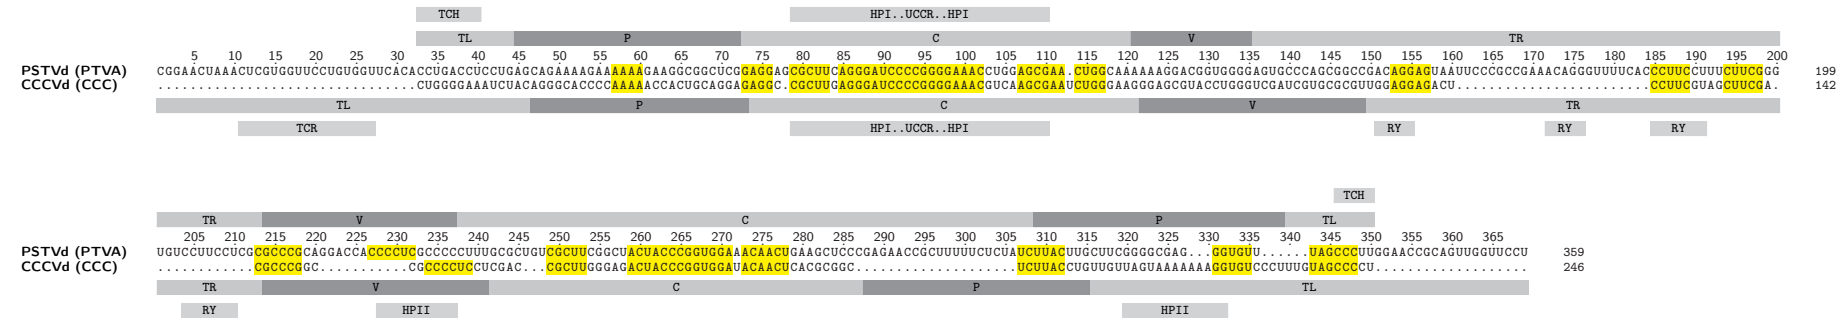

PSTVd (PTVA) vs. HSVd (X00009)

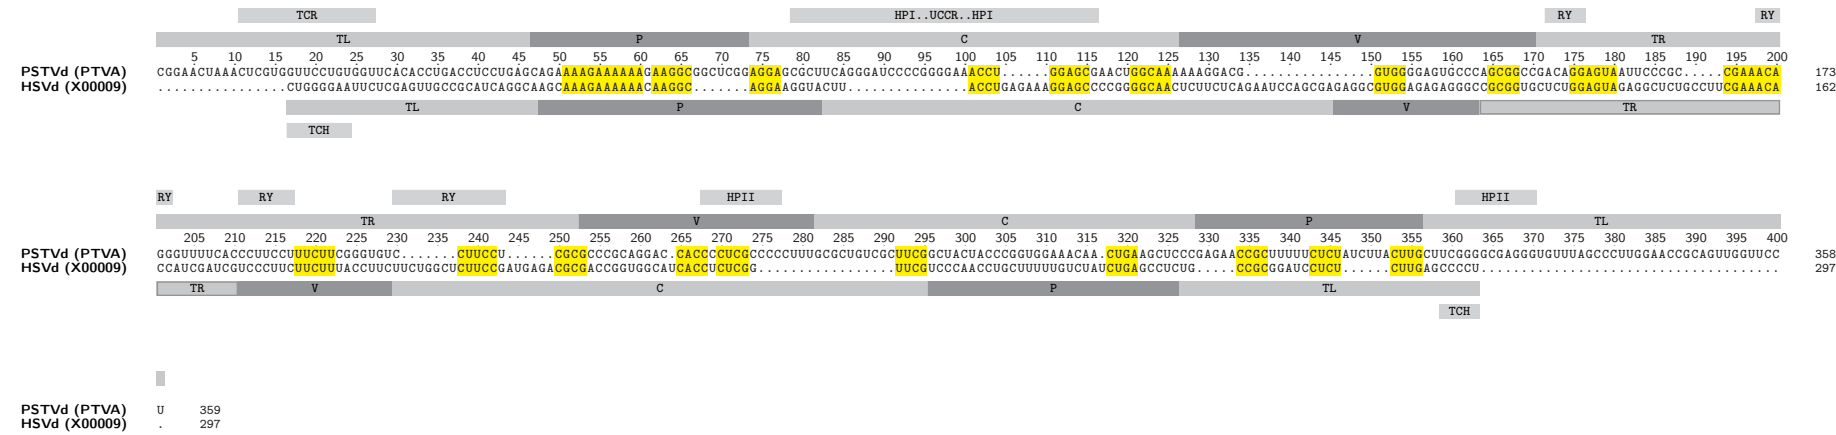

Figure S4: Continued from previous page

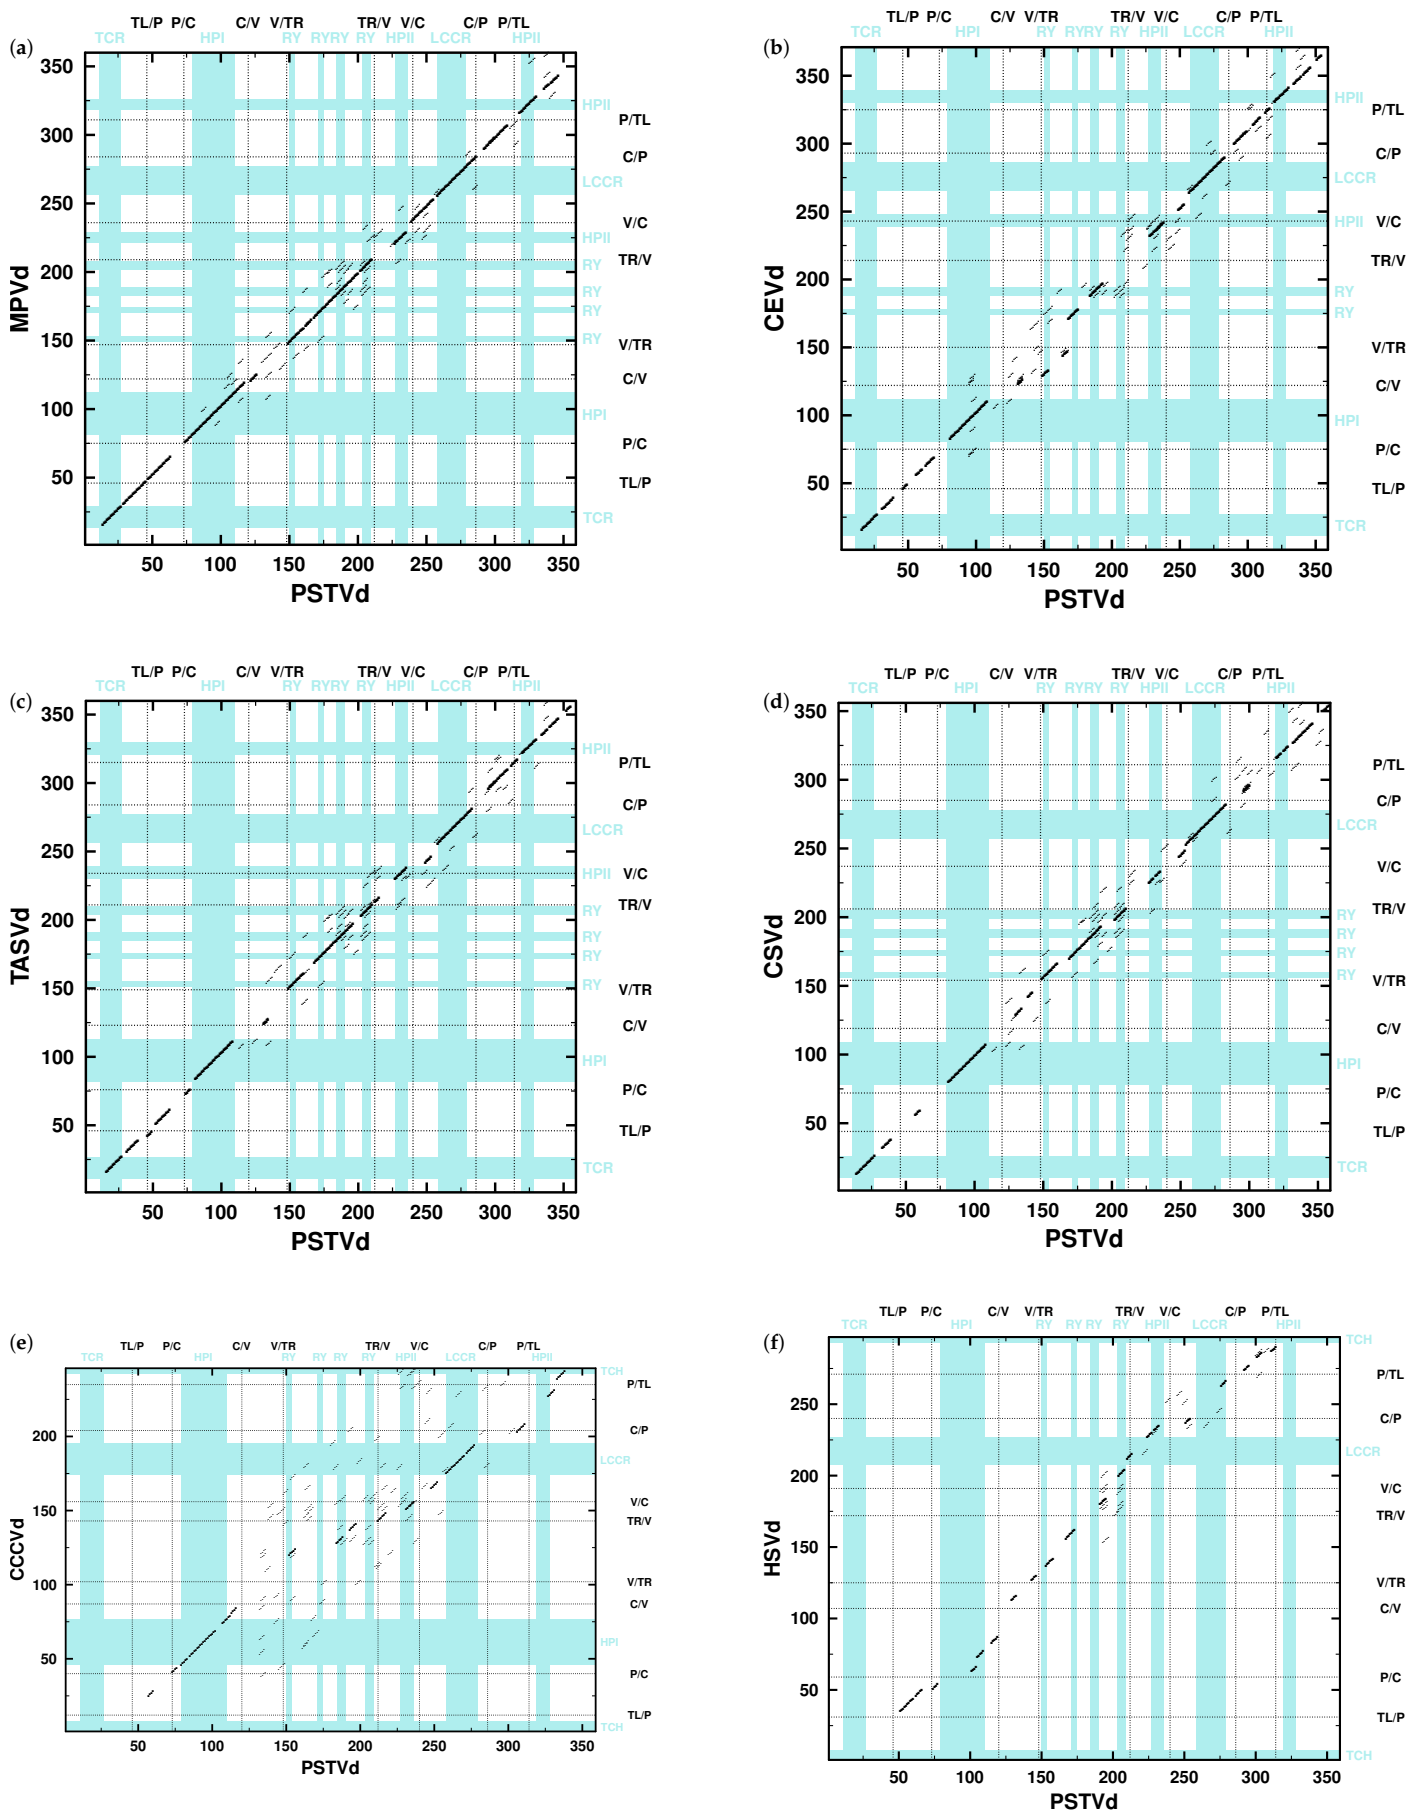

Figure S5. Dotplots between the sequences used by Keese and Symons (1985).  
Figure is continued on next page.

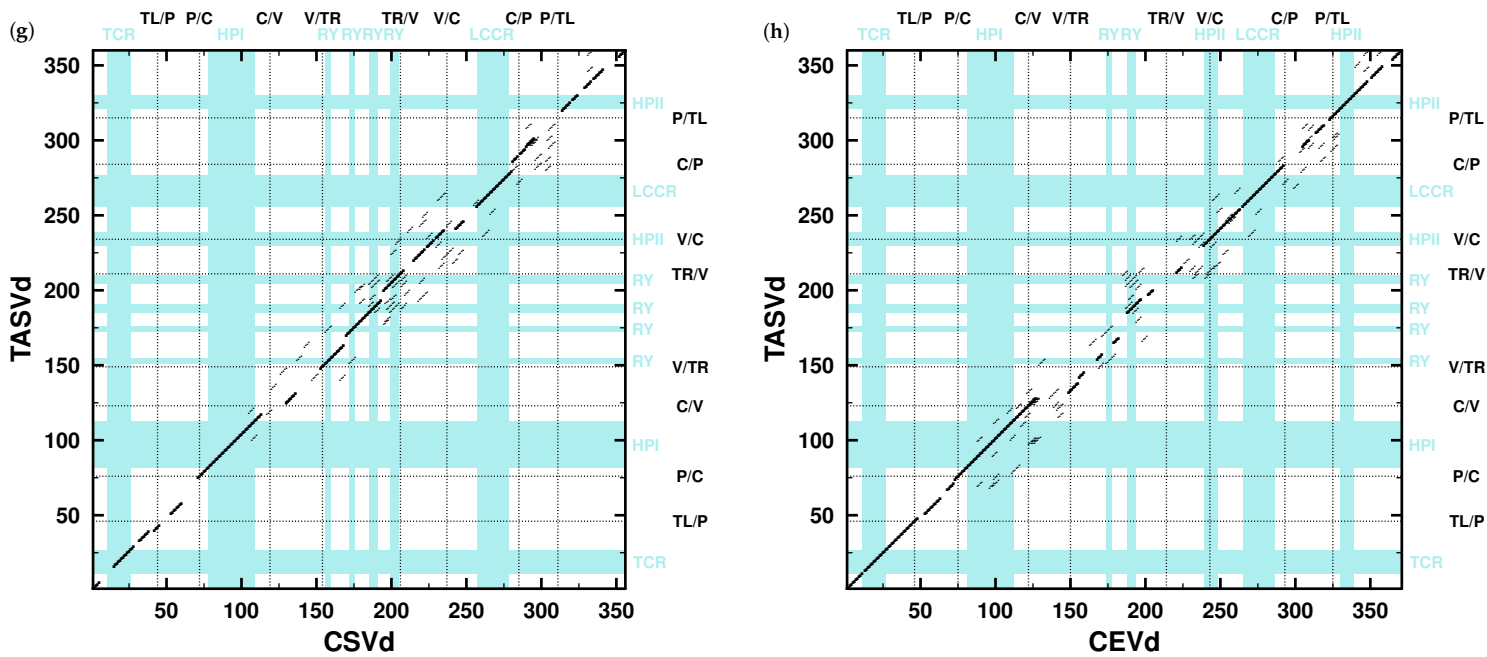

**Figure S5.** Continued from previous page.

Axis labels are the viroid species name (PSTVd, GenBank locus PTVA; MPVd, TPM; CEVd, CEV; TASVd, TASCg; CSVd, V01107; CCCVd, CCC; HSVd, X00009). Alignments were calculated using NUCALN with  $k$ -tuple length  $k = 4$ , gap parameter  $g = 4$ , and window size  $w = 25$  (cf. Figure S1); these are the parameter combinations mentioned in McInnes and Symons [3]. Corresponding matches are marked by thin diagonal lines; the significant combination of matches is marked by thick diagonal lines. Boundaries of terminal left (TL), pathogenicity (P), central (C), variable (V) and terminal right (TR) domain are marked by dotted lines at positions as given in [9]. Terminal conserved region (TCR, Figure S20), terminal conserved hairpin (TCH, Figure S21), hairpin I (HPI, Figure 22(a)), hairpin II (HPII, Figure S25), and purine-pyrimidine (RY, Figure S26) motifs are indicated by blue bars.

Alignments of HSVd, PSTVd (f), CEVd (b), and TASVd (c) are mentioned in [9] to be used in determination of the P domain borders.

CSVd and TASVd (g) are mentioned in [9] to be used in determination of the C domain borders together with comparisons of CEVd/TASVd (h), PSTVd/MPVd/CCCVd ((a) and (e)).

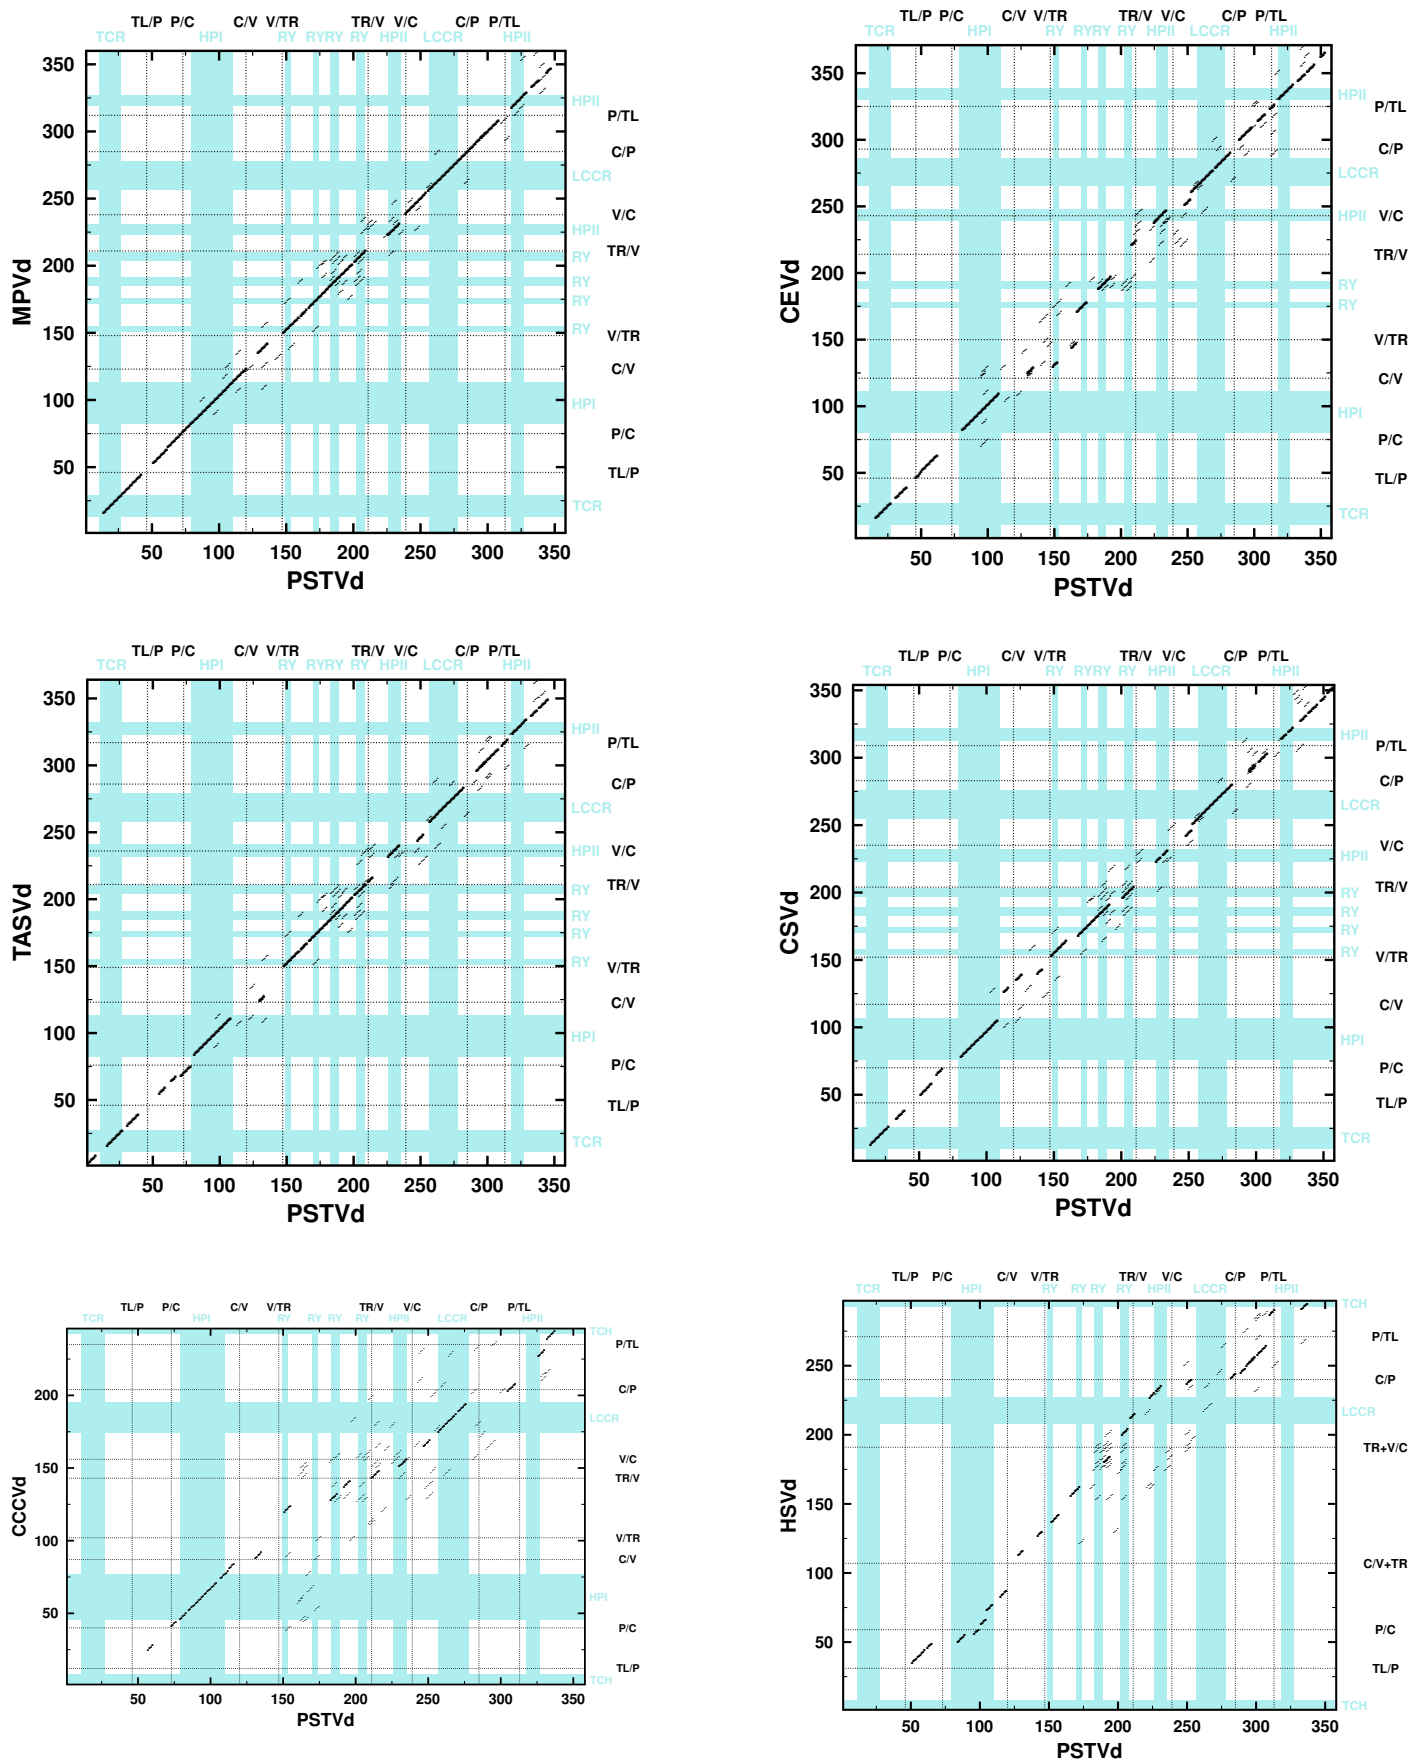

**Figure S6.** Dotplots between consensus sequences of the species used by Keese and Symons (1985). Axis labels are the viroid species name. For consensus sequences see main text; for further details see Figure S5.

**Table S2.** Pairwise sequence identity of the sequences used by Keese and Symons (1985) after alignment with NUCALN ( $k = 4$  and  $g = 4$ ). HSVd was omitted because of the missing boundaries of its V and TR domains in [9]. The column “overall” shows pairwise sequence identity (PSI; in percent) values for full-length sequences; all other columns show PSI values for domains as given by [9]. Note that the matrix is not symmetric because the domains of the individual species do not coincide.

|       | CCCvd |      |      |      |      |         | CEVd |      |      |      |      |         | CSVd |      |      |      |      |         |
|-------|-------|------|------|------|------|---------|------|------|------|------|------|---------|------|------|------|------|------|---------|
|       | TL    | P    | C    | V    | TR   | overall | TL   | P    | C    | V    | TR   | overall | TL   | P    | C    | V    | TR   | overall |
| CCCvd | –     | –    | –    | –    | –    | –       | 35.2 | 60.1 | 70.9 | 59.1 | 69.2 | 55.7    | 65.9 | 53.4 | 67.9 | 49.5 | 58.3 | 49.2    |
| CEVd  | 38.5  | 69.3 | 63.7 | 34.6 | 69.2 | 55.7    | –    | –    | –    | –    | –    | –       | 78.9 | 76.0 | 62.1 | 45.0 | 65.7 | 65.8    |
| CSVd  | 68.6  | 56.8 | 52.4 | 74.2 | 58.3 | 49.2    | 79.8 | 74.0 | 71.0 | 58.6 | 65.7 | 67.8    | –    | –    | –    | –    | –    | –       |
| MPVd  | 36.0  | 68.3 | 65.2 | 43.8 | 47.6 | 56.1    | 75.6 | 77.9 | 85.8 | 60.9 | 46.8 | 65.8    | 66.5 | 62.4 | 83.3 | 86.1 | 96.2 | 69.2    |
| PSTVd | 32.1  | 51.7 | 76.8 | 47.6 | 63.0 | 57.7    | 70.4 | 74.0 | 58.0 | 69.8 | 56.2 | 62.1    | 66.7 | 72.1 | 69.0 | 67.7 | 88.9 | 64.4    |
| TASVd | 41.7  | 65.0 | 54.7 | 57.5 | 75.0 | 53.3    | 94.5 | 85.9 | 80.4 | 57.2 | 52.8 | 77.8    | 72.2 | 71.0 | 78.4 | 76.9 | 96.2 | 74.3    |

  

|       | MPVd |      |      |      |      |         | PSTVd |      |      |      |      |         | TASVd |      |      |      |      |         |
|-------|------|------|------|------|------|---------|-------|------|------|------|------|---------|-------|------|------|------|------|---------|
|       | TL   | P    | C    | V    | TR   | overall | TL    | P    | C    | V    | TR   | overall | TL    | P    | C    | V    | TR   | overall |
| CCCvd | 12.5 | 60.6 | 52.0 | 52.0 | 47.6 | 56.1    | 40.2  | 51.8 | 81.0 | 42.3 | 63.0 | 58.1    | 39.8  | 69.2 | 54.7 | 50.6 | 75.0 | 52.4    |
| CEVd  | 75.0 | 78.9 | 66.5 | 55.0 | 46.8 | 66.1    | 70.1  | 70.7 | 58.6 | 55.2 | 56.2 | 61.8    | 94.4  | 85.9 | 78.0 | 63.9 | 52.8 | 77.8    |
| CSVd  | 67.5 | 72.2 | 72.7 | 90.9 | 96.2 | 69.2    | 68.2  | 66.5 | 67.4 | 68.4 | 88.9 | 64.1    | 73.9  | 69.3 | 81.5 | 76.9 | 96.2 | 74.3    |
| MPVd  | –    | –    | –    | –    | –    | –       | 68.5  | 83.1 | 71.2 | 63.6 | 92.2 | 76.6    | 72.8  | 76.6 | 79.8 | 74.4 | 96.8 | 72.5    |
| PSTVd | 68.0 | 83.0 | 74.8 | 64.6 | 92.2 | 76.6    | –     | –    | –    | –    | –    | –       | 70.1  | 71.7 | 68.3 | 70.3 | 91.9 | 69.6    |
| TASVd | 72.6 | 77.3 | 71.6 | 71.5 | 96.8 | 72.5    | 70.3  | 72.2 | 70.6 | 59.4 | 91.9 | 69.1    | –     | –    | –    | –    | –    | –       |

**Table S3.** Pairwise sequence identity of the sequences used by Keese and Symons (1985) after alignment with NUCALN with parameters  $k = 3$  and  $g = 3$ . Each first and second columns show the values from an alignment using NUCALN; the first column shows pairwise sequence identity (PSI; in percent) for domains of sequence 1, the second column shows PSI for domains of sequence 2. Each third column shows the values given in Table 2 of [9] as “Sequence homology between domains of different viroids”: “Sequence homology was determined by the best alignment, allowing for additions and deletions, but constrained by the requirement of a match consisting of a minimum of three consecutive residues. Percent sequence homology =  $\frac{\text{number of matching residues in both sequences}}{\text{total number of residues compared}} \times 100$ .” [9]. NA, not available from Table 2 of [9].

| Viroids |       | Sequence homology, % |      |     |      |      |     |      |      |     |      |      |     |      |      |     |         |      |     |
|---------|-------|----------------------|------|-----|------|------|-----|------|------|-----|------|------|-----|------|------|-----|---------|------|-----|
|         |       | Domains              |      |     |      |      |     |      |      |     |      |      |     |      |      |     | Overall |      |     |
|         |       | TL                   |      |     | P    |      |     | C    |      |     | V    |      |     | TR   |      |     |         |      |     |
| 1       | 2     | 1/2                  | 2/1  | [9] | 1/2  | 2/1  | [9] | 1/2  | 2/1  | [9] | 1/2  | 2/1  | [9] | 1/2  | 2/1  | [9] | 1/2     | 2/1  | [9] |
| CCCVd   | CEVd  | 41.1                 | 28.8 | N/A | 55.8 | 58.6 | N/A | 65.7 | 64.8 | N/A | 44.0 | 44.0 | N/A | 39.7 | 40.0 | N/A | 47.0    | 49.6 | N/A |
|         | CSVd  | 38.3                 | 43.5 | N/A | 50.9 | 46.5 | N/A | 55.0 | 62.9 | N/A | 36.3 | 28.9 | N/A | 38.2 | 35.6 | N/A | 45.0    | 47.0 | N/A |
|         | MPVd  | 39.2                 | 18.6 | N/A | 61.8 | 62.0 | N/A | 67.5 | 70.2 | N/A | 47.9 | 41.0 | N/A | 35.8 | 35.4 | N/A | 50.5    | 49.5 | N/A |
|         | PSTVd | 35.1                 | 25.0 | 25  | 51.6 | 56.3 | 14  | 64.8 | 65.1 | 70  | 34.3 | 34.8 | 37  | 35.3 | 37.4 | 27  | 47.9    | 47.9 | 38  |
|         | TASVd | 39.8                 | 34.1 | N/A | 56.8 | 55.2 | N/A | 48.3 | 62.2 | N/A | 39.1 | 46.8 | N/A | 38.3 | 36.4 | N/A | 46.2    | 49.2 | N/A |
| CEVd    | CCCVd | 28.8                 | 41.1 | N/A | 58.6 | 55.8 | N/A | 64.8 | 65.7 | N/A | 44.0 | 44.0 | N/A | 40.0 | 39.7 | N/A | 49.6    | 47.0 | N/A |
|         | CSVd  | 80.2                 | 81.2 | N/A | 72.1 | 71.0 | N/A | 69.0 | 70.0 | N/A | 41.7 | 51.7 | N/A | 48.4 | 58.7 | 38  | 68.1    | 68.7 | 59  |
|         | MPVd  | 77.0                 | 77.5 | N/A | 76.2 | 74.6 | N/A | 57.2 | 65.5 | N/A | 47.4 | 53.4 | N/A | 48.1 | 48.3 | 37  | 66.8    | 66.8 | 60  |
|         | PSTVd | 69.3                 | 69.6 | 62  | 75.6 | 76.1 | 62  | 63.1 | 63.4 | 65  | 49.1 | 45.6 | 31  | 48.1 | 45.1 | 38  | 65.5    | 64.4 | 55  |
|         | TASVd | 93.4                 | 93.5 | N/A | 85.3 | 85.3 | N/A | 84.5 | 86.7 | N/A | 54.4 | 57.7 | N/A | 56.1 | 58.6 | 46  | 79.3    | 80.2 | 73  |
| CSVd    | CCCVd | 43.5                 | 38.3 | N/A | 46.5 | 50.9 | N/A | 62.9 | 55.0 | N/A | 28.9 | 36.3 | N/A | 35.6 | 38.2 | N/A | 47.0    | 45.0 | N/A |
|         | CEVd  | 81.2                 | 80.2 | 77  | 71.0 | 72.1 | 42  | 70.0 | 69.0 | 82  | 51.7 | 41.7 | 28  | 58.7 | 48.4 | 38  | 68.7    | 68.1 | 59  |
|         | MPVd  | 72.7                 | 69.6 | N/A | 69.8 | 72.1 | N/A | 72.7 | 73.4 | N/A | 74.9 | 74.5 | N/A | 87.7 | 87.7 | N/A | 73.7    | 73.7 | N/A |
|         | PSTVd | 78.0                 | 75.4 | 69  | 66.3 | 67.7 | 49  | 59.6 | 63.4 | 71  | 66.2 | 65.7 | 31  | 82.5 | 81.4 | 81  | 69.6    | 70.1 | 61  |
|         | TASVd | 78.7                 | 76.9 | N/A | 66.8 | 68.7 | N/A | 84.4 | 81.7 | N/A | 71.6 | 70.2 | N/A | 87.7 | 87.7 | N/A | 76.8    | 76.8 | N/A |
| MPVd    | CCCVd | 18.6                 | 39.2 | N/A | 62.0 | 61.8 | N/A | 70.2 | 67.5 | N/A | 41.0 | 47.9 | N/A | 35.4 | 35.8 | N/A | 49.5    | 50.5 | N/A |
|         | CEVd  | 77.5                 | 77.0 | 80  | 74.6 | 76.2 | 70  | 65.5 | 57.2 | 69  | 53.4 | 47.4 | 29  | 48.3 | 48.1 | 37  | 66.8    | 66.8 | 60  |
|         | CSVd  | 69.6                 | 72.7 | N/A | 72.1 | 69.8 | N/A | 73.4 | 72.7 | N/A | 74.5 | 74.9 | N/A | 87.7 | 87.7 | N/A | 73.7    | 73.7 | N/A |
|         | PSTVd | 72.0                 | 72.5 | 67  | 82.6 | 83.0 | 73  | 81.4 | 81.2 | 94  | 88.5 | 83.7 | 42  | 95.2 | 94.6 | 95  | 82.3    | 82.3 | 76  |
|         | TASVd | 78.9                 | 78.6 | N/A | 69.1 | 71.9 | N/A | 70.7 | 64.7 | N/A | 74.6 | 75.1 | N/A | 96.8 | 96.8 | N/A | 75.8    | 76.7 | N/A |
| PSTVd   | CCCVd | 25.0                 | 35.1 | N/A | 56.3 | 51.6 | N/A | 65.1 | 64.8 | N/A | 34.8 | 34.3 | N/A | 37.4 | 35.3 | 27  | 47.9    | 47.9 | 38  |
|         | CEVd  | 69.6                 | 69.3 | N/A | 76.1 | 75.6 | N/A | 63.4 | 63.1 | N/A | 45.6 | 49.1 | N/A | 45.1 | 48.1 | 38  | 64.4    | 65.5 | 55  |
|         | CSVd  | 75.4                 | 78.0 | N/A | 67.7 | 66.3 | N/A | 63.4 | 59.6 | N/A | 65.7 | 66.2 | N/A | 81.4 | 82.5 | N/A | 70.1    | 69.6 | N/A |
|         | MPVd  | 72.5                 | 72.0 | N/A | 83.0 | 82.6 | N/A | 81.2 | 81.4 | N/A | 83.7 | 88.5 | N/A | 94.6 | 95.2 | N/A | 82.3    | 82.3 | N/A |
|         | TASVd | 67.1                 | 67.1 | N/A | 69.1 | 72.9 | N/A | 70.5 | 73.1 | N/A | 71.4 | 60.3 | N/A | 90.6 | 91.9 | 90  | 70.4    | 71.5 | 64  |
| TASVd   | CCCVd | 34.1                 | 39.8 | N/A | 55.2 | 56.8 | N/A | 62.2 | 48.3 | N/A | 46.8 | 39.1 | N/A | 36.4 | 38.3 | N/A | 49.2    | 46.2 | N/A |
|         | CEVd  | 93.5                 | 93.4 | 91  | 85.3 | 85.3 | 54  | 86.7 | 84.5 | 99  | 57.7 | 54.4 | 99  | 58.6 | 56.1 | 46  | 80.2    | 79.3 | 73  |
|         | CSVd  | 76.9                 | 78.7 | N/A | 68.7 | 66.8 | N/A | 81.7 | 84.4 | N/A | 70.2 | 71.6 | N/A | 87.7 | 87.7 | N/A | 76.8    | 76.8 | N/A |
|         | MPVd  | 78.6                 | 78.9 | N/A | 71.9 | 69.1 | N/A | 64.7 | 70.7 | N/A | 75.1 | 74.6 | N/A | 96.8 | 96.8 | N/A | 76.7    | 75.8 | N/A |
|         | PSTVd | 67.1                 | 67.1 | 67  | 72.9 | 69.1 | 59  | 73.1 | 70.5 | 65  | 60.3 | 71.4 | 30  | 91.9 | 90.6 | 90  | 71.5    | 70.4 | 64  |

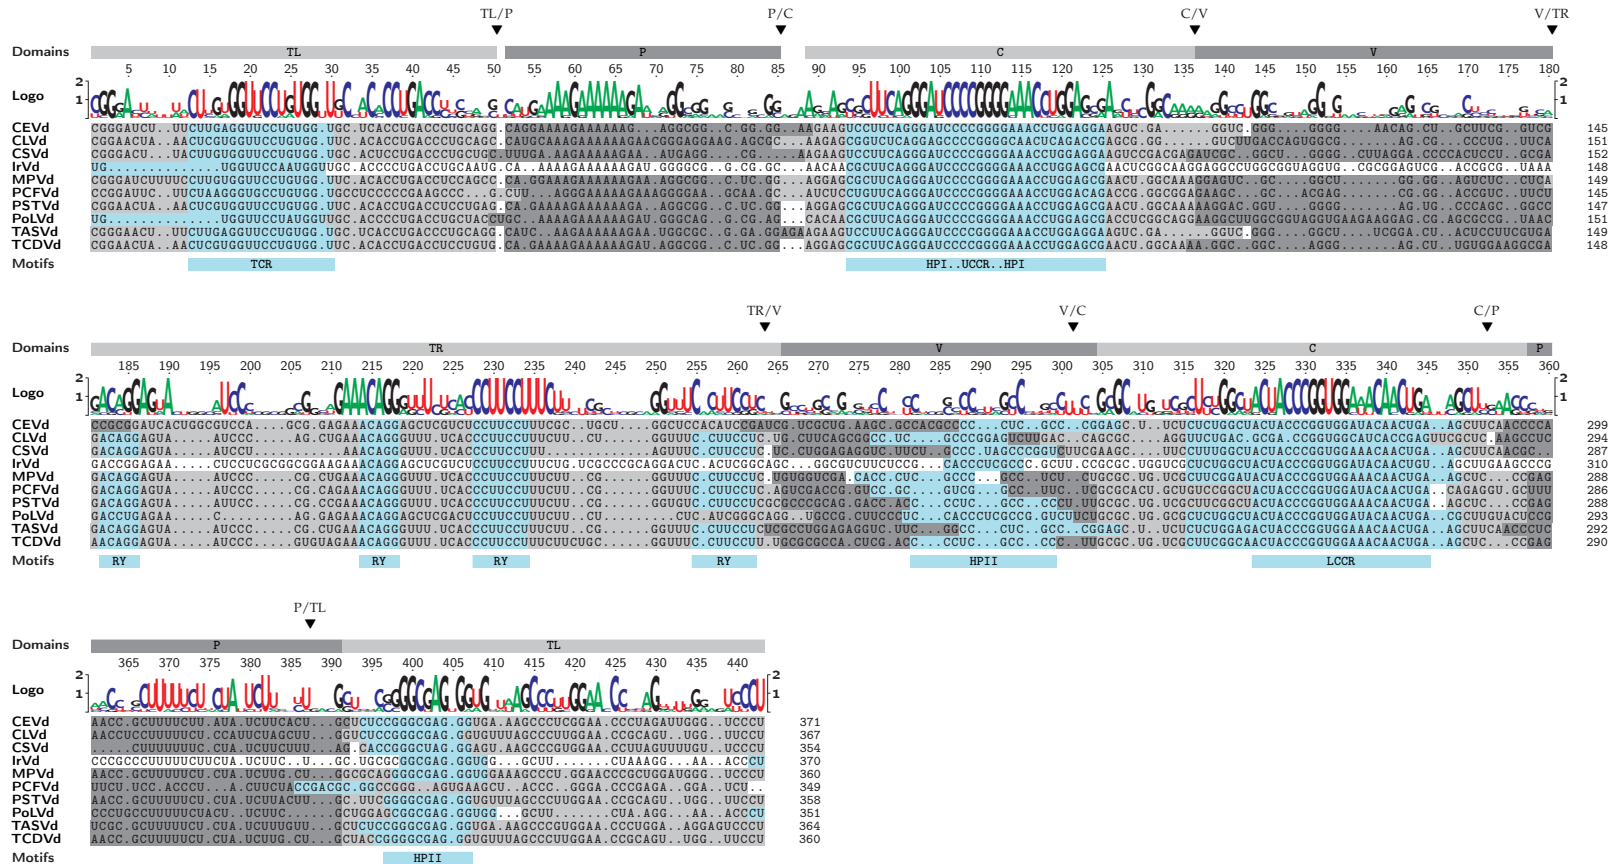

**Figure S7.** MAFFT alignment between consensus sequences of *Pospiviroid* members. Sequences were aligned using MAFFT X-INS-I with options `-maxiterate 1000` and `-retree 100`. For consensus sequences see main text. For annotation of CLVd see [10].

Top: domain borders consistent between all *Pospiviroid* members, positioned as described in section 3.2.

Bars at top: domains according to [9].

The line labeled “Logo” shows a sequence logo of the ten sequences [7,11].

Bottom line: TCH (Figure S21), TCR (Figure 20(a)), HPI (Figure S22), RY (Figure S26), and HPII (Figure S25) motifs are marked.

For the corresponding dotplot see Figure S9.

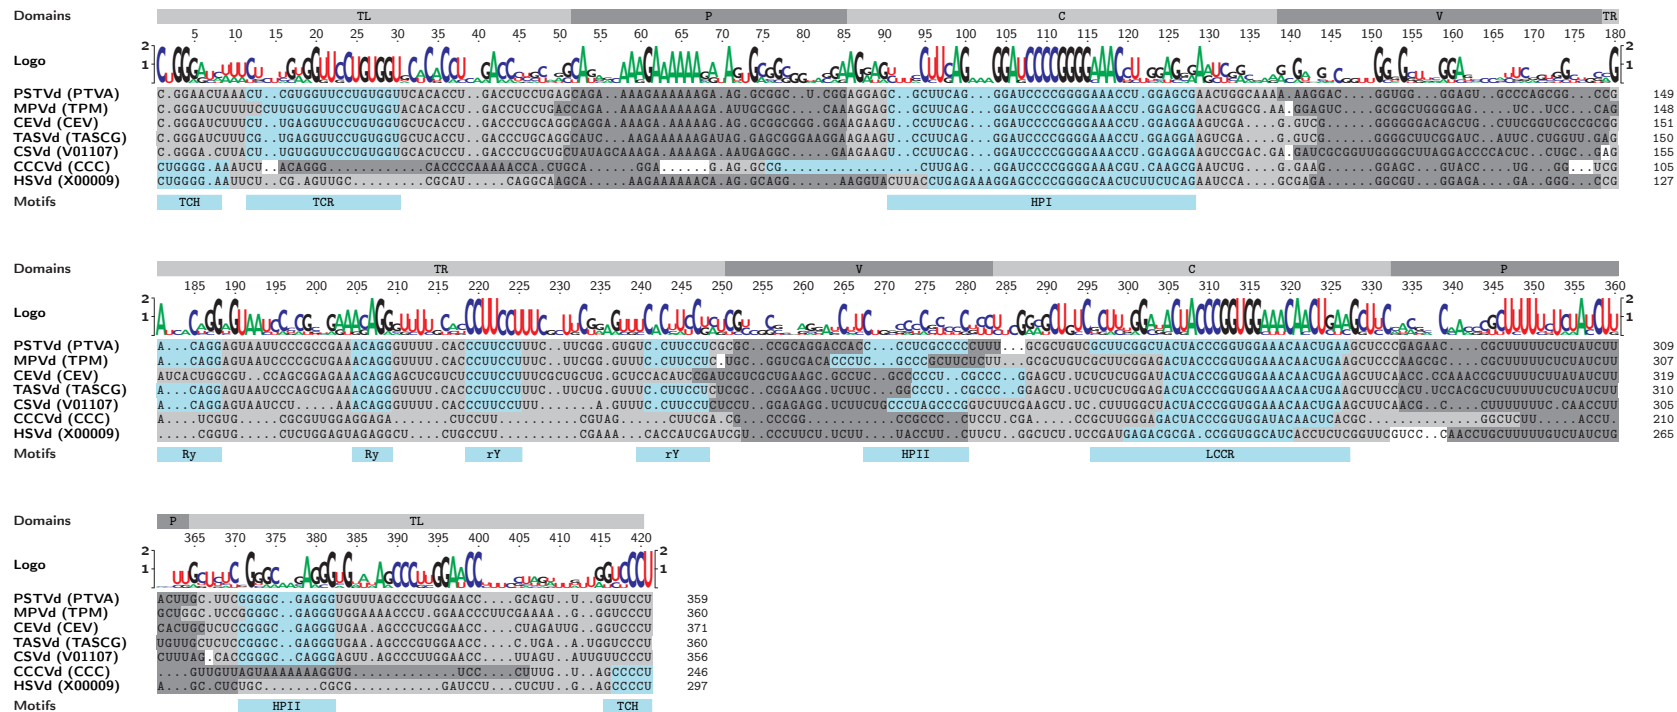

**Figure S8.** MAFFT alignment between sequences used in Keese and Symons (1987). Sequences were aligned using MAFFT X-INS-I with options `-maxiterate 1000` and `-retree 100`.

Left: The GENBANK LOCUS of the respective viroid is given in brackets after the viroid name.

Line at top: domains according to [9].

The line labeled “Logo” shows a sequence logo of the seven sequences [7,11].

Bottom line: TCH (Figure S21), TCR (Figure 20(a)), HPI (Figure S22), RY (Figure S26), and HP11 (Figure S25) motifs are marked.

The TCH is only present in cocadviroids, like CCCVd, and hostuviroids, like HSVd. The TCR is only present in *Pospiviroid* members. The RY motif is present only once in CEVd, IrVd, and PolVd, but twice in the other *Pospiviroid* members.

**Table S4.** Average pairwise sequence identity of consensus sequences of *Pospiviroid* species after alignment with MAFFT X-INS-I. For the alignment see Figure S7.

(a) Pairwise sequence identity (PSI; in percent) values of full-length sequences. The APSI value of the alignment is 64.0%.

(b) Average pairwise sequence identity (APSI; in percent) values of domains [9]. For each row the domain borders of the given species are used. Note that column values are not identical because the domains of the individual species do not coincide.

| (a)    |       |      |      |       |      |      |
|--------|-------|------|------|-------|------|------|
| Viroid | CCCVd | HSVd | CSVd | TASVd | CEVd | MPVd |
| PSTVd  | 61.0  | 50.5 | 68.1 | 71.2  | 68.7 | 82.4 |
| MPVd   | 59.3  | 49.2 | 72.0 | 74.7  | 68.9 |      |
| CEVd   | 61.4  | 56.9 | 72.9 | 78.0  |      |      |
| TASVd  | 62.6  | 53.5 | 80.5 |       |      |      |
| CSVd   | 52.4  | 45.8 |      |       |      |      |
| HSVd   | 54.1  |      |      |       |      |      |

| (b)    |      |      |      |      |      |
|--------|------|------|------|------|------|
| Viroid | TL   | P    | C    | V    | TR   |
| PSTVd  | 62.3 | 66.5 | 76.8 | 49.0 | 55.2 |
| MPVd   | 63.0 | 64.7 | 75.9 | 49.8 | 55.6 |
| CEVd   | 62.6 | 65.6 | 73.9 | 48.6 | 55.0 |
| TASVd  | 62.3 | 66.2 | 74.0 | 49.3 | 56.0 |
| CSVd   | 62.8 | 65.0 | 76.0 | 49.8 | 50.5 |
| HSVd   | 64.4 | 63.0 | 74.2 | 49.7 | 50.0 |
| CCCVd  | 67.4 | 62.5 | 71.7 | 49.6 | 74.1 |
| Mean   | 63.5 | 64.8 | 74.6 | 49.4 | 56.6 |

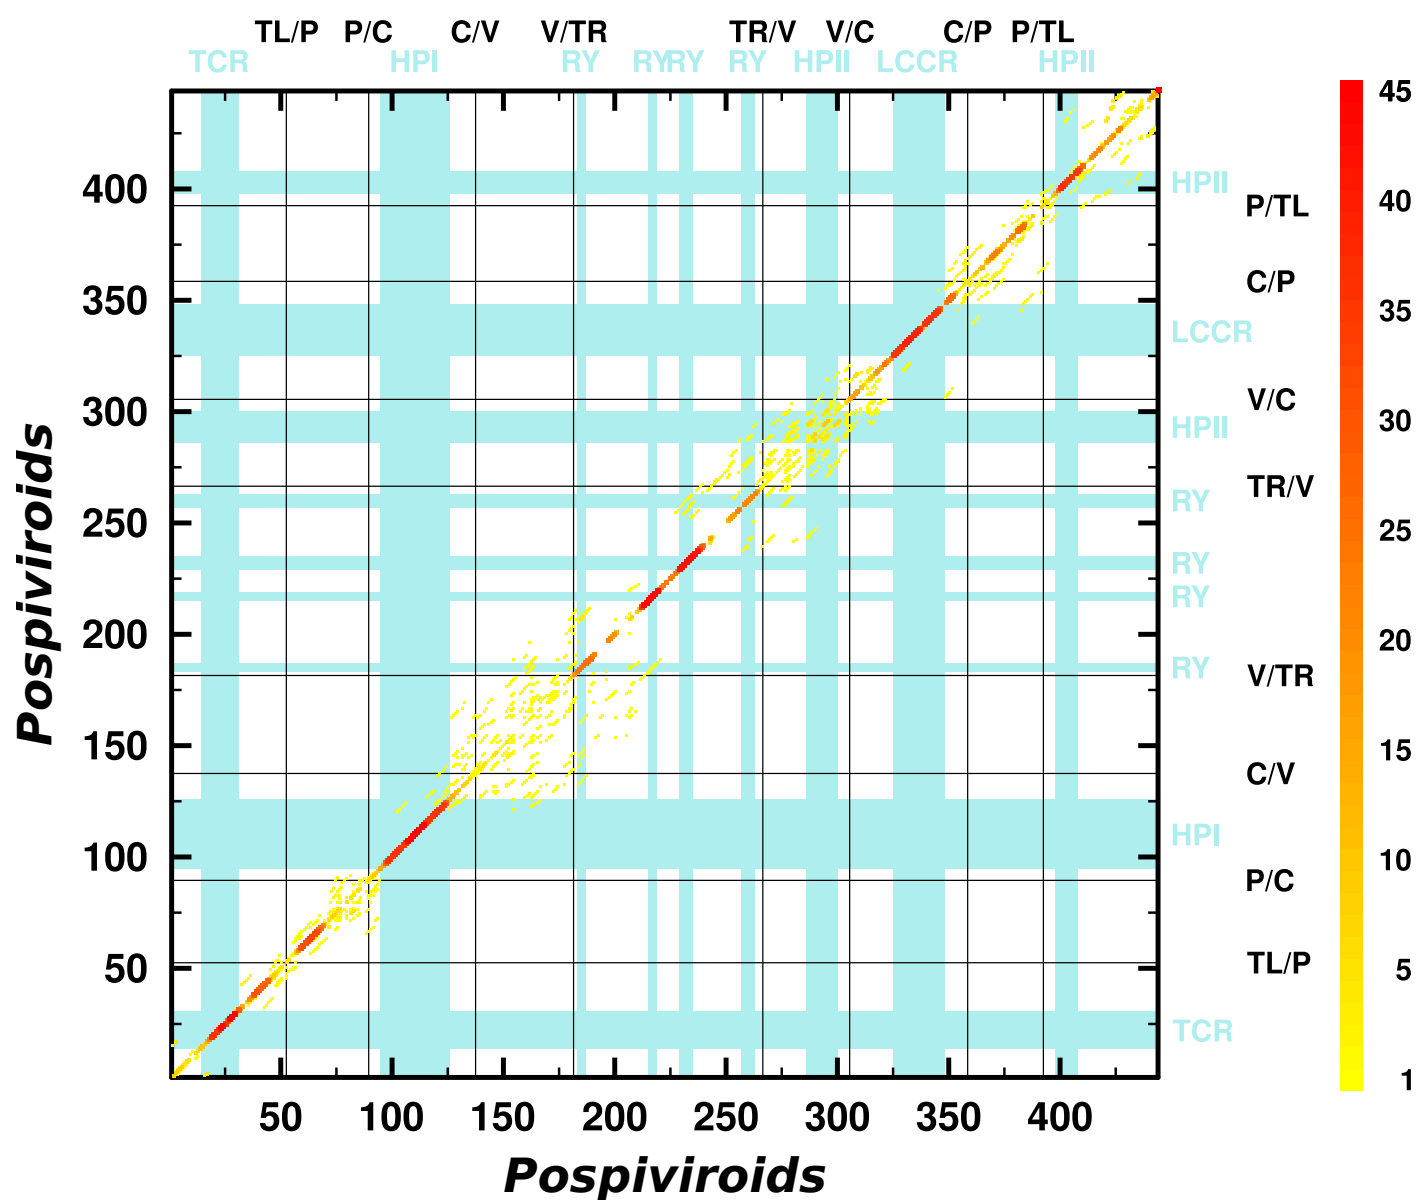

**Figure S9.** Overlay of dotplots from NUCALN alignments for all *Pospiviroid* members. For sequences see Figure S7. For further details see Figure 2.

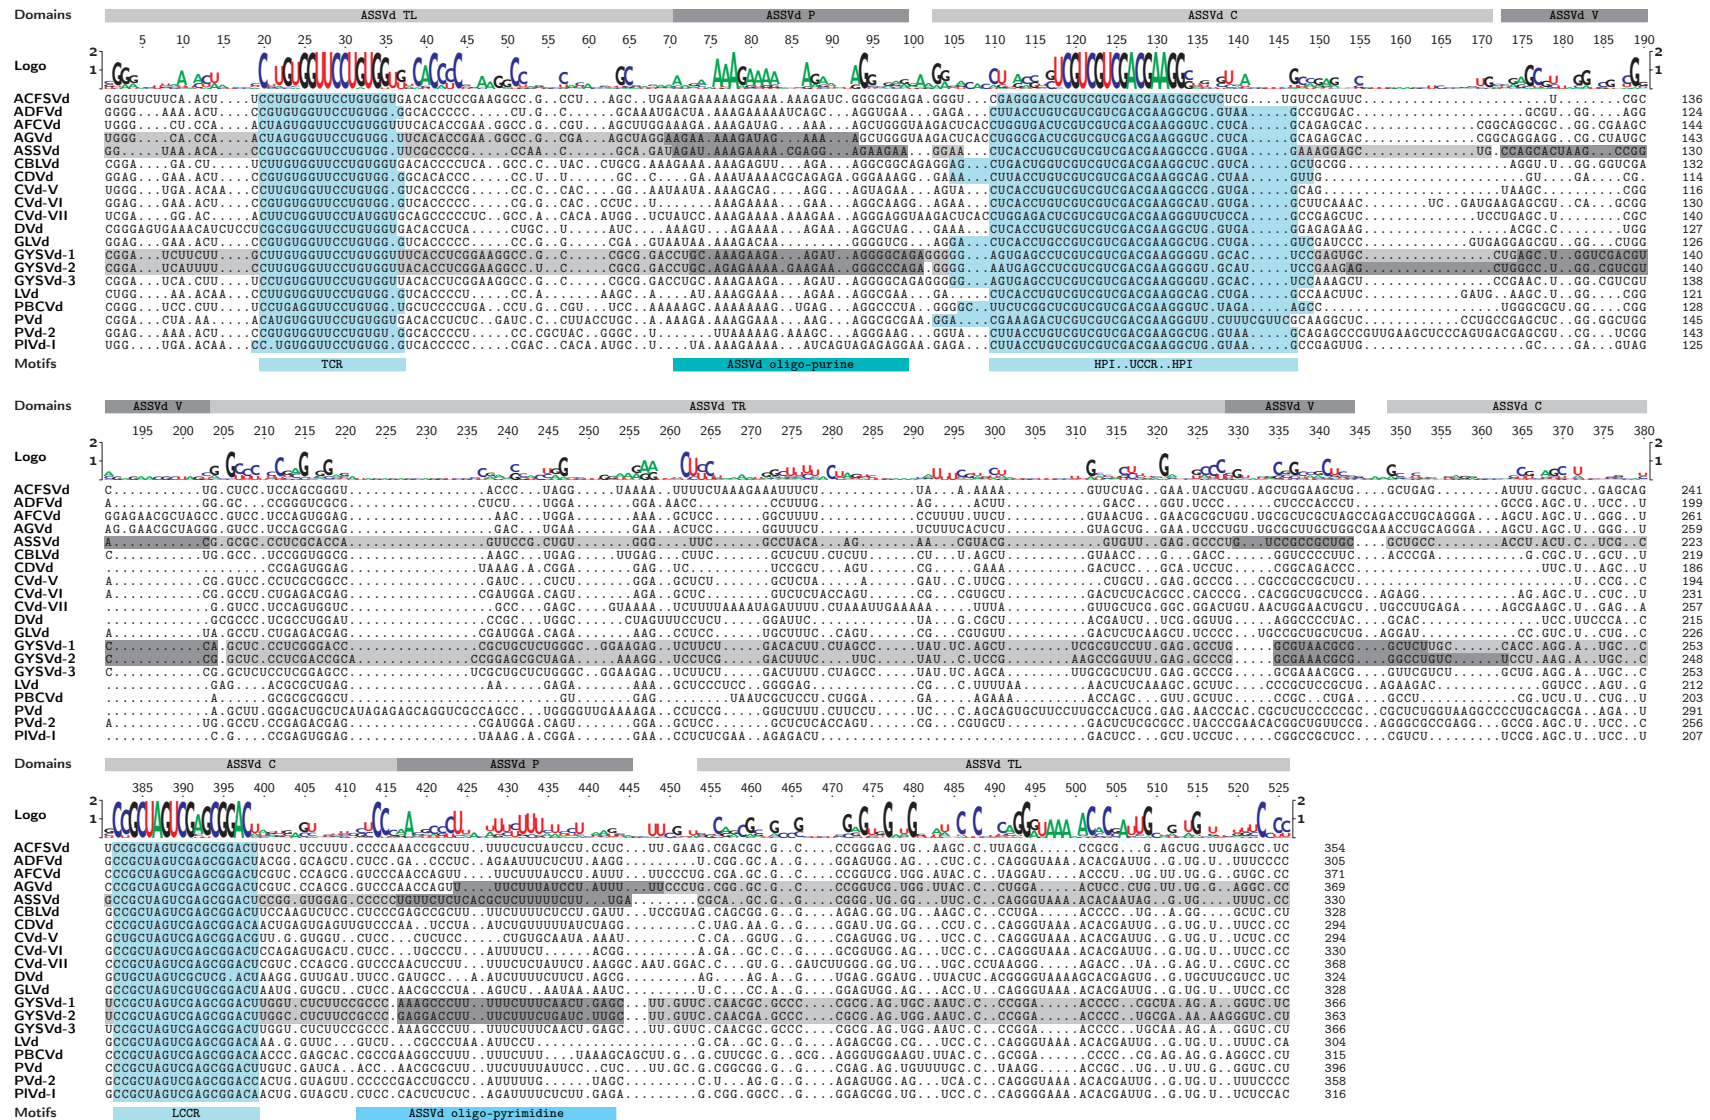

**Figure S10.** MAFFT alignment between consensus sequences of *Apscaviroid* members. Sequences were aligned using MAFFT X-INS-1 with options `-maxiterate 1000` and `-retree 100` [6]. For sequence names see (Table S1). For consensus sequences see main text.

The line labeled “Domains” shows domains of ASSVd [12].

The line labeled “Logo” shows a sequence logo of the 20 consensus sequences [7,11].

Bottom line: For details on TCR (Figure 20(b)), HPI and UCCR (Figure S23), LCCR (Figure S24) see respective figures.

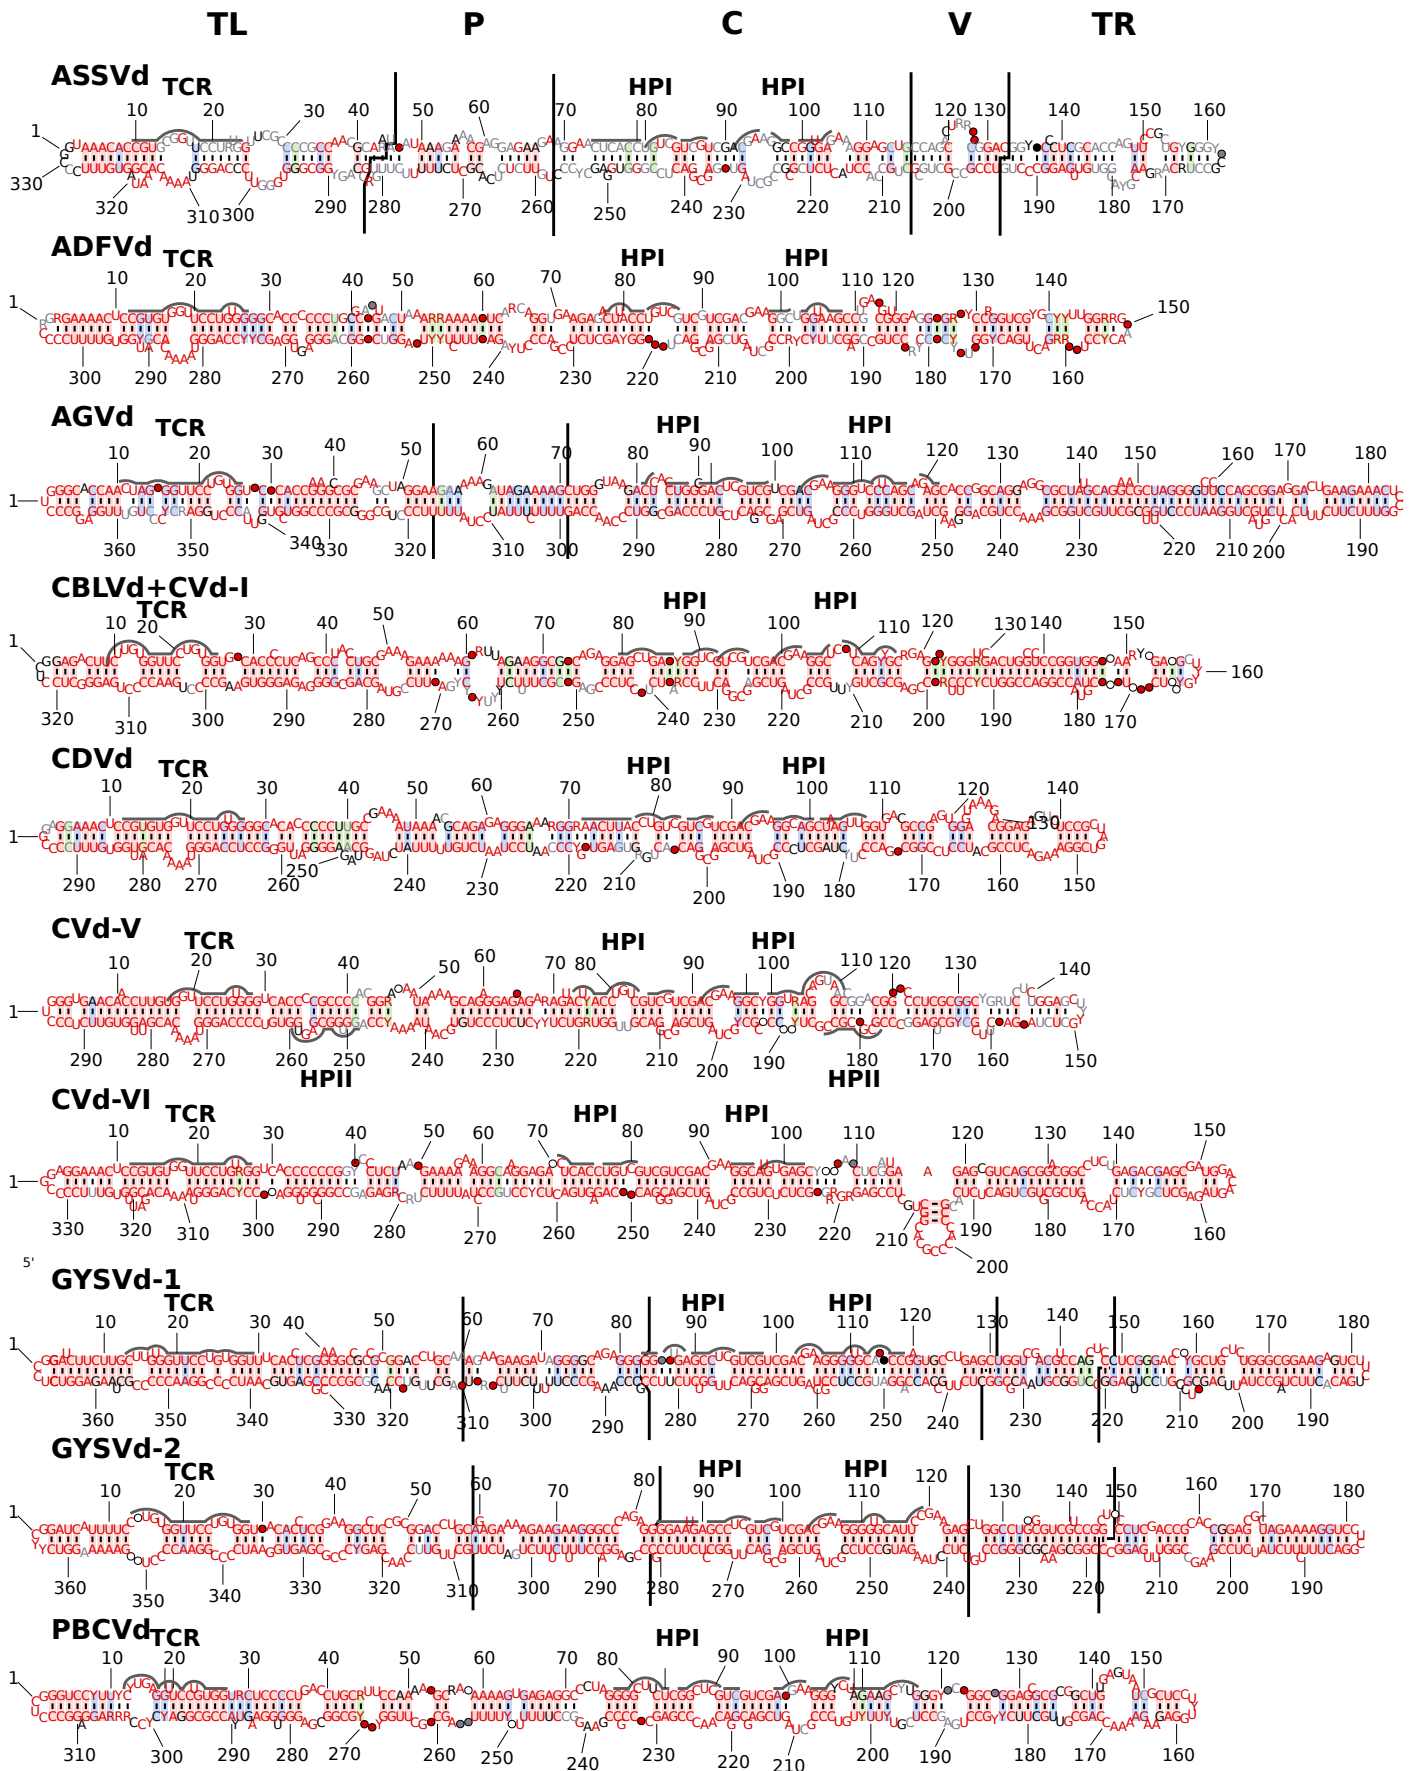

**Figure S11.** Consensus sequences and secondary structures of *Apscaviroid* members. Domain borders of ASSVd, GYSVd-1, GYSVd-2 [12], and AGVd [13] are marked by black lines.

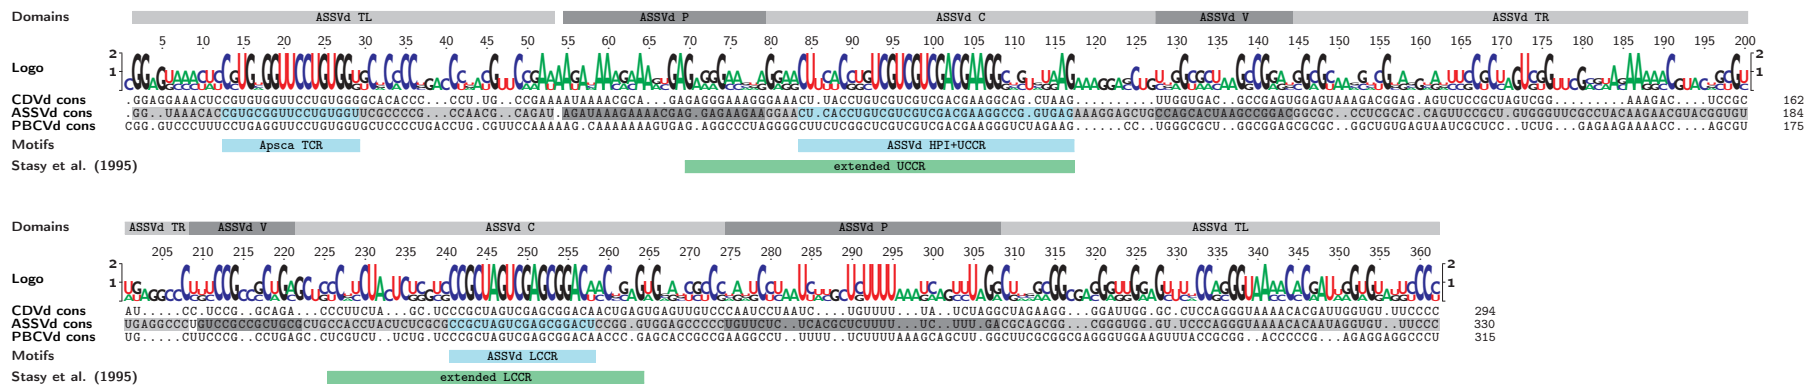

Figure S12. Alignment of CDVd, ASSVd, and PBCVd..

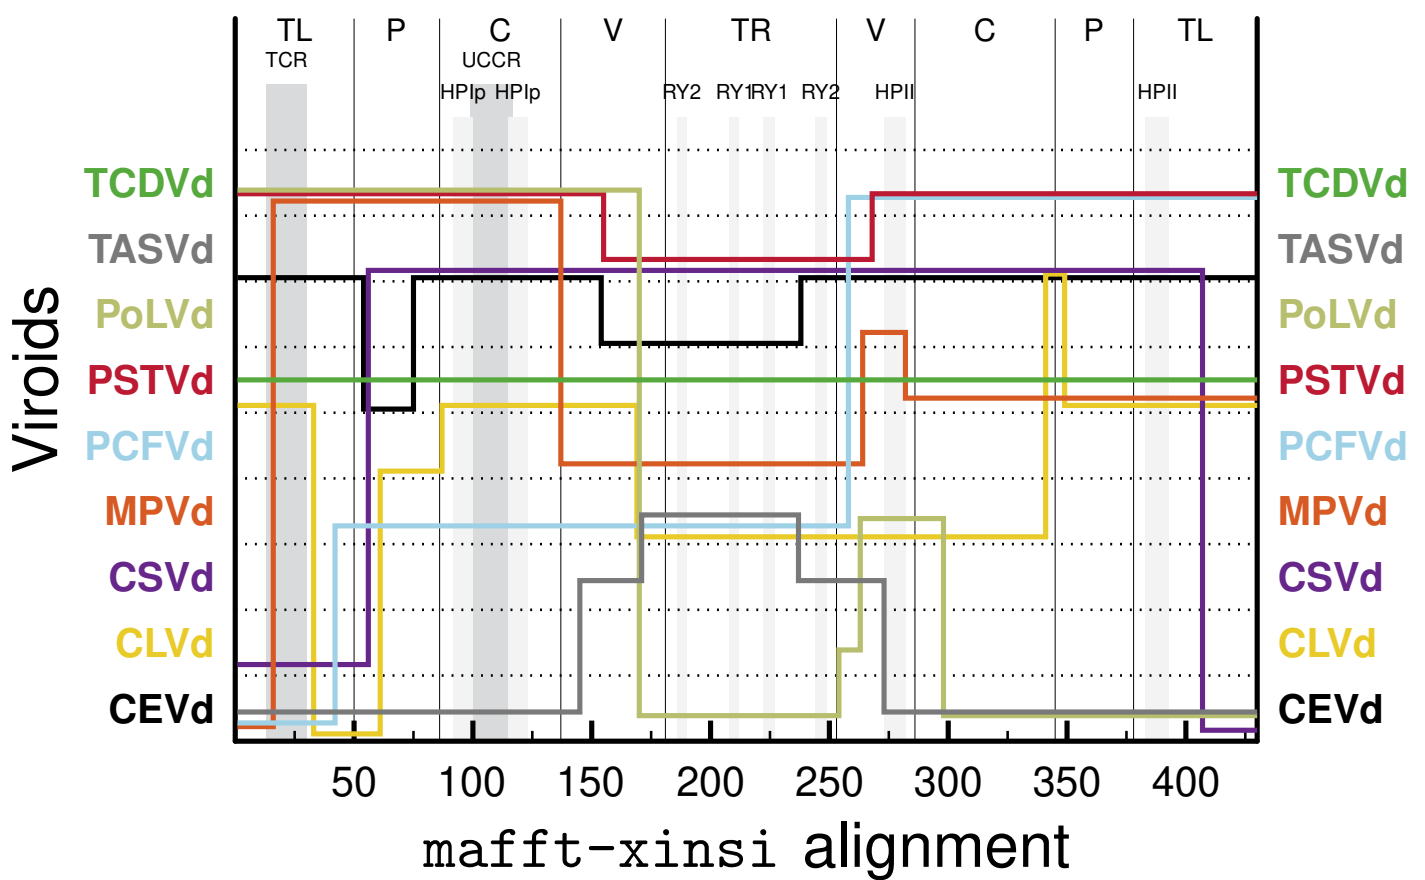

**Figure S13.** Similarity among *Pospiviroid* members. JALI output for seed alignment of all *Pospiviroid* members. The seed alignment of consensus sequences was produced with MAFFT X-INS-I.

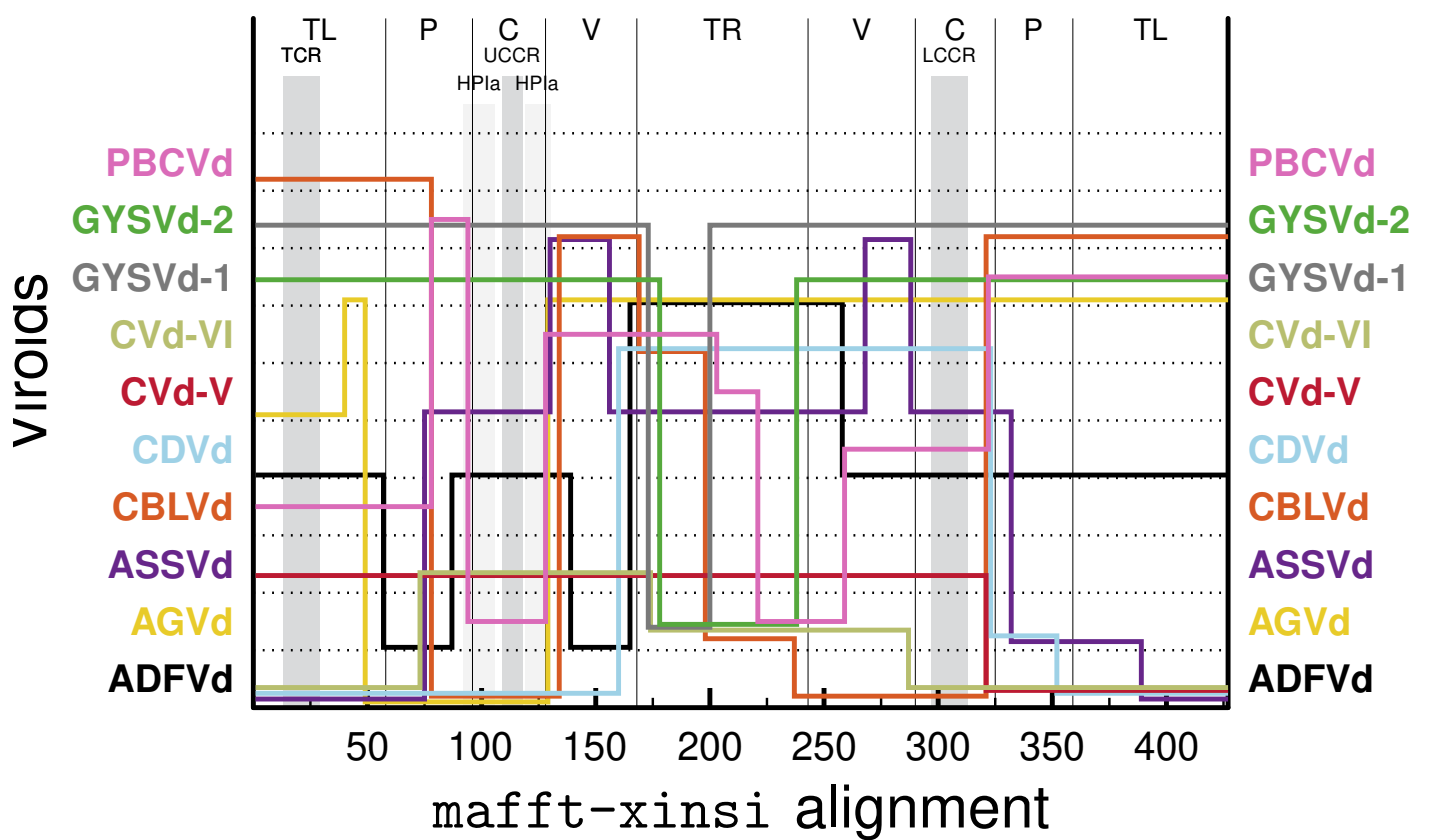

**Figure S14.** Similarity among *Apscaviroid* members. JALI output for seed alignment of all *Apscaviroid* members. The seed alignment of consensus sequences was produced with MAFFT X-INS-I.

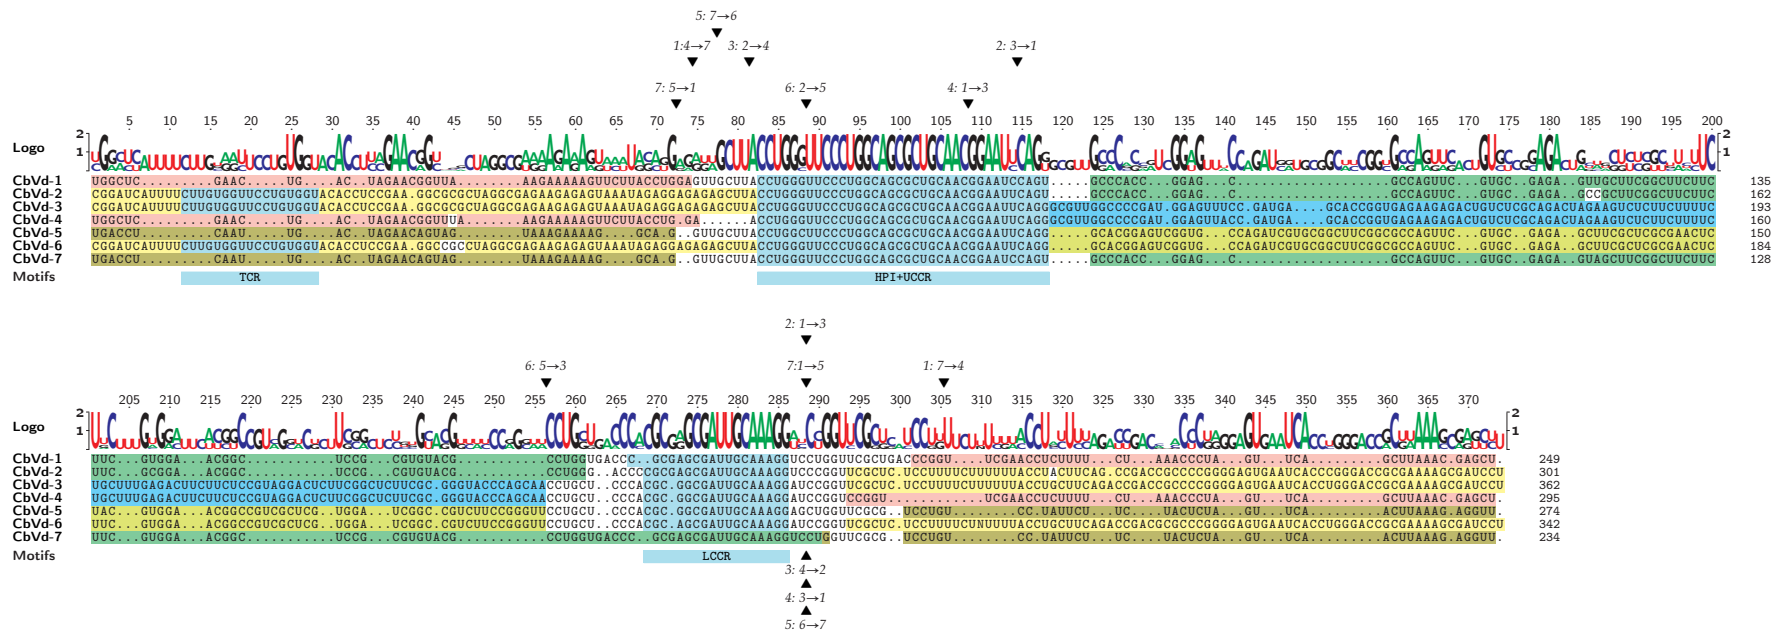

**Figure S15.** MAFFT alignment between the consensus sequences of *Coleviroid* members. Sequences were aligned using MAFFT X-INS-I with options `-maxiterate 1000` and `-retree 100` [6]. For consensus sequences see main text. *Coleviroid* members share structural elements, which are shown by identically colored background; that is, CBVd-1 consists of element A (red background) and element C (green background), CBVd-2 consists of element B (yellow background) and element C (green background), CBVd-3 consists of element B (yellow background) and element D (blue background), CBVd-4 consists of element A (red background) and element D (blue background), CBVd-5 consists of element F (khaki background) and element E (yellowgreen background), CBVd-6 consists of element B (yellow background) and element E (yellowgreen background), and CBVd-7 consists of element F (khaki background) and element C (green background). Sequence elements on white background are either mutations, gaps, or sequence elements that are not restricted to one of the elements A–F. The annotations in the three top and bottom lines denote the predicted recombination points by JALI (see Figure S16). Each annotation “#1: #2→#3)” denotes the coleus blumei viroid number (CBVd#1) and the two coleus blumei viroid numbers (CBVd#3→CBVd#4), between which JALI predicts the recombination points.

(a)

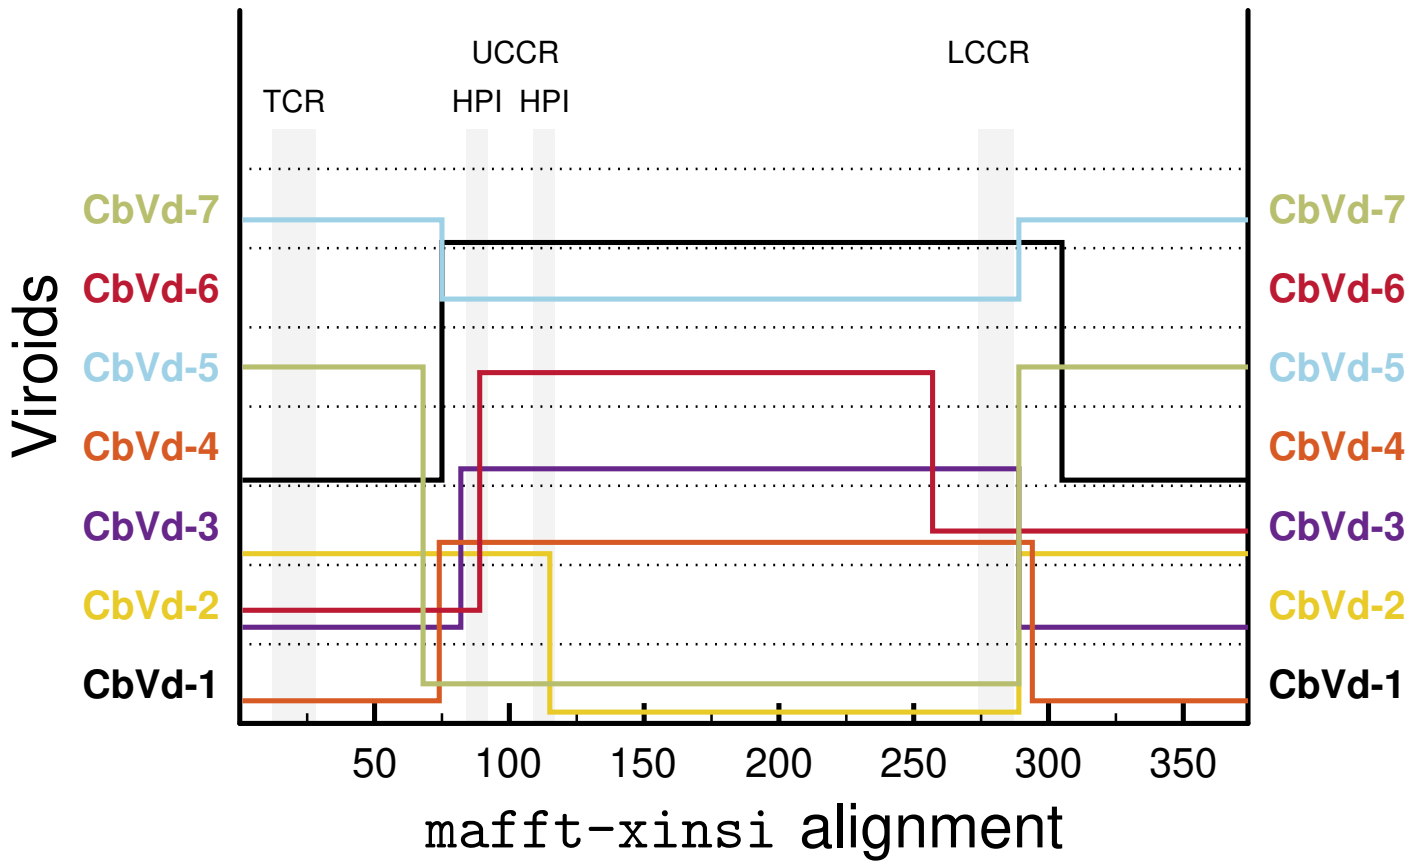

(b)

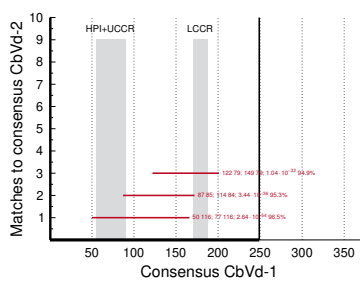

(c)

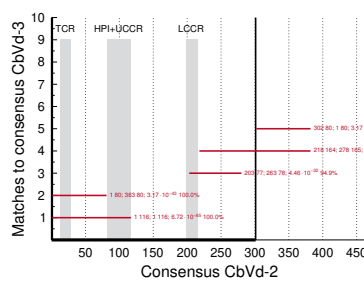

(d)

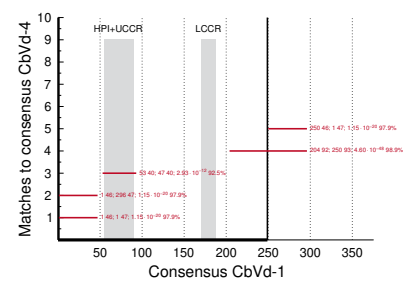

**Figure S16.** Similarity among *Coleviroid* members.

(a) JALI output for seed alignment of all *Coleviroid* members. The seed alignment of consensus sequences was produced with MAFFT X-INS-1 (Figure S15).

(b)–(d) VMATCH output for comparison of CbVd-1 with CbVd-2 (b), CbVd-2 with CbVd-3 (c), and CbVd-1 with CbVd-4 (d) with parameters -l 40, -e 4, and -leastscore 40.

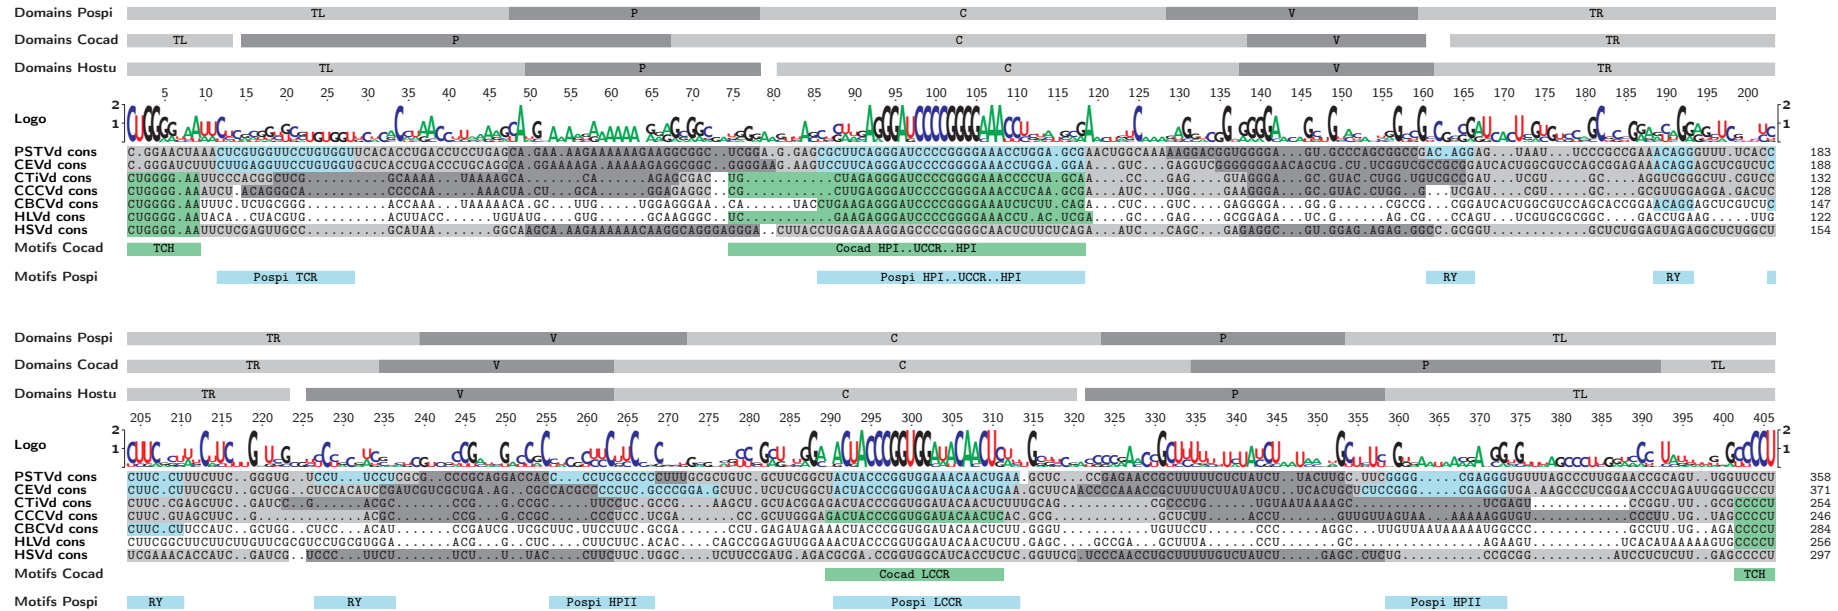

**Figure S17.** MAFFT alignment between members of genera *Cocad-*, *Pospivi-*, and *Hostuviroid*. CCCVd, CBCVd, CTiVd, and HLVd belong to members of genus *Cocadviroid*, PSTVd and CEVd of *Pospiviroid*, and HSVd of *Hostuviroid* (Table S1). Sequences were aligned using MAFFT X-INS-I with options `-maxiterate 1000` and `-retree 100`. For consensus sequences see main text.

PSTVd and CEVd have a TCR (Figure 20(a)); cocadviroids and HSVd have a TCH (Figure S21). PSTVd, as most pospiviroids, has two RY motifs, while CEVd and CBCVd, in this respect an exceptional cocadviroid, have one RY motif.

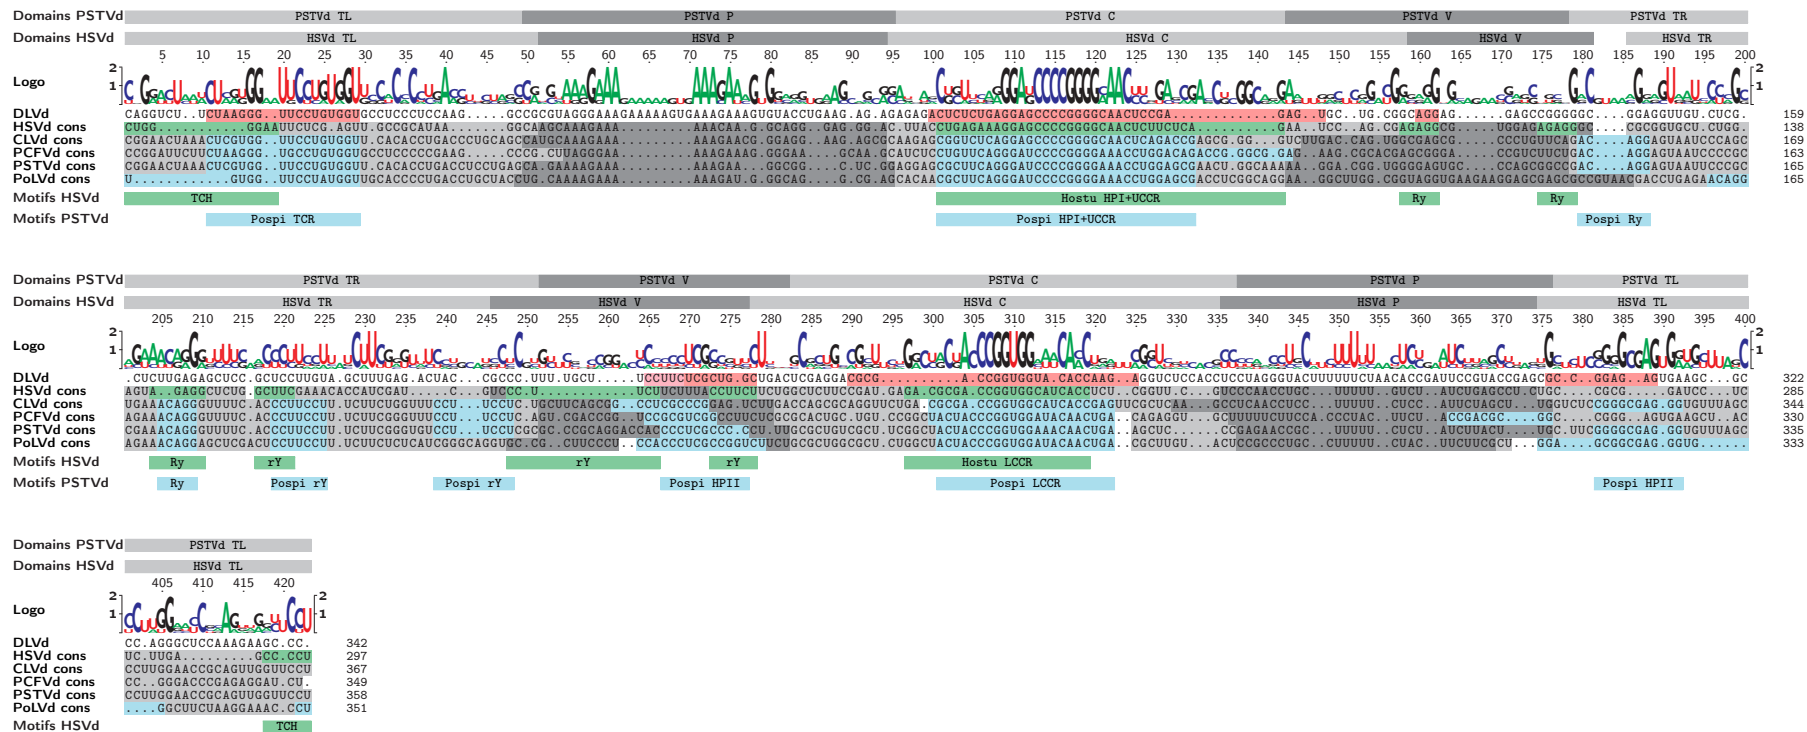

**Figure S18.** MAFFT alignment of DLVd, HSVd, and selected members of *Pospiviroid*.

Top: domains in PSTVd and HSVd.

Bottom: conserved motifs in PSTVd (green) and HSVd (blue). For the RY motifs in HSVd see [14,15].

Conserved motifs of DLVd [16] are shown on reddish background: TCR as in members of *Pospiviroid*; no TCH in contrast to HSVd; one RY motif (positions 160–162 and 265–270 in the alignment) similar to HSVd; HPII (positions 269–278 and 374–389 in the alignment) as in members of *Pospiviroid*.

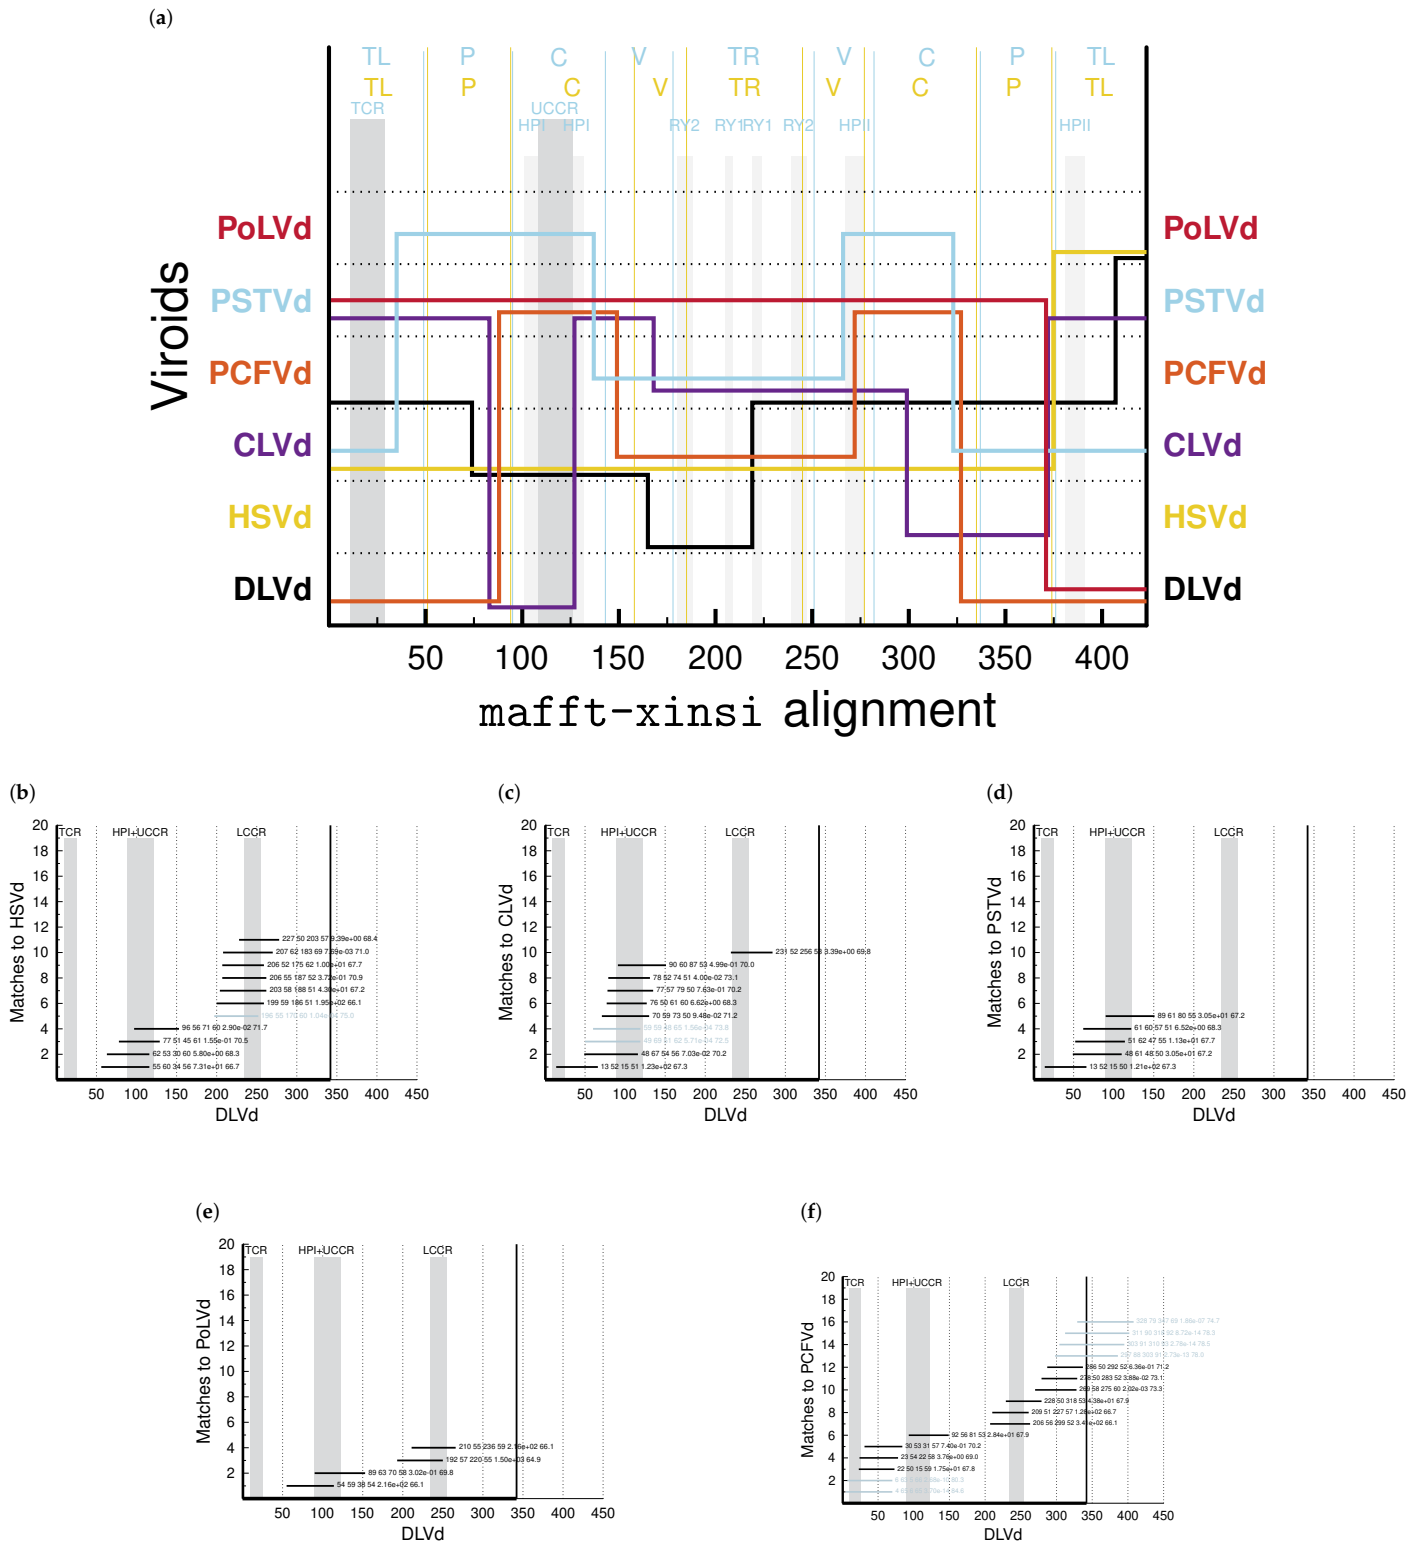

**Figure S19.** Similarity among DLVd, HSVd, and selected members of *Pospiviroid*.

(a) JALI output for seed alignment of DLVd and consensus sequences of HSVd and selected members of *Pospiviroid*. DLVd and HSVd belong to genus *Hostuviroid* (Table S1).

Top: positions of domain borders and conserved motifs in PSTVd (blue) and HSVd (yellow). For the seed alignment see Figure S18.

(b)–(f) VMATCH output for comparison of DLVd to consensus sequences of HSVd and selected members of *Pospiviroid* with parameters  $-l$  50,  $-e$  20, and  $-leastscore$  50. Sequence matches with  $E < 1e-3$  are colored blue.

The high similarity of DLVd to PCFVd (f) spans the full TL domain; JALI only detects this similarity for the upper TL domain, because the match extends over the 3'–5' end. Otherwise VMATCH detects a high similarity of DLVd with HSVd in range of lower C domain (b) and with CLVd in the upper C domain (c).

**Table S5.** Consistent domain borders of *Pospiviroid* members. For each *Pospiviroid* member the positions of domain borders in the consensus sequence and two versions of a sequence stretch overlapping the respective domain border are shown. The first version is valid for the respective consensus sequence, the second version is a regular expression that matches the domain border in  $\geq 90\%$  of resective sequences. The only used regular expression term is 'X{#1,#2}', that matches a repeat of nucleotide X #1 to #2 times. For IUPAC nomenclature see Table S6.

| Species | TL↔P                                                                         | P↔C                                                                    | C↔V                                                                        | V↔TR                                                                      |
|---------|------------------------------------------------------------------------------|------------------------------------------------------------------------|----------------------------------------------------------------------------|---------------------------------------------------------------------------|
| PSTVd   | 46   47<br>ACCUCCUGAG   CARAAAAGA<br>ACYTCYBDHN   HAT{0,1}RNVH{0,1}WRR       | 73   74<br>GGGGGCUCCG   AGGAGCGCU<br>DROGGYNGCS   DSSRGSKCY            | 120   121<br>AACUGGCAAA   AAGGACGGU<br>AACYRGCAAHM{0,2}RGGSC{0,1}V{0,1}CRG | 147   148<br>CCYAGCGGCC   GACAGGAGU<br>SCYT{0,1}NNYRGY   RACHKSMGT        |
|         | 312   313<br>UAUCUACU   GCUUCGGGG<br>NNWYTHNY{0,1}HNHKNH{0,1}DHC{0,1}YRGGG   | 283   284<br>ACUGAAGCUC   CCGAGAAACCG<br>ACTGRAGYTC   CCGAGRDCCG       | 237   238<br>CUCGCCCCU   UUGCGCUGU<br>CUSGCC{0,1}CCY   YBGCDCGY            | 209   210<br>GUCCUCCUC   GCGCCGCA<br>KTCYTCCTCY   GCGSCGSR                |
| CEVd    | 46   47<br>ACCUCCUGAG   CAGGAAAAG<br>VMYCYKYNRS   CVKHNHRDD                  | 74   75<br>GGCGGGGGG   AAGAGUCCU<br>RNRBVN{0,1}RGSV   RRRDRYBST        | 118   119<br>AGGAAGUCGA   GUGCGGGGG<br>aggaRGYGV   KXTYKGG{0,1}KK          | 146   147<br>gcuccGUGC   CCGCGGAUCA<br>gcyucRNSR   CMYGSAYCD              |
|         | 324   325<br>UAUCUACU   GCUUCGGG<br>NRYTTHDMK   GBYCYCCGG                    | 292   293<br>ACUGAAGCUC   CAACCCAAA<br>ACBGRDGSY   YDRMCYMD            | 247   248<br>CCCCCGGCC   CGAGCmuc<br>CCCTSGCY   SGRWGCTtc                  | 218   219<br>CCACUCCGA   UCGCGeng<br>YCATCTYGR   WBGTCRbug                |
| CLVd    | 46   47<br>ACCUCCUGAG   CAUGAAAAG<br>ACCTYGCRRS   CAUGSRA{1,2}R              | 79   80<br>GGAAGAGCGC   AAGAGCGGU<br>GRRAGMKGB   A{2,3}GAGCGGU         | 122   123<br>ACCGAGCGGG   GUCUUGACC<br>ACCGAGCGGG   GWN{1,3}KGRYS          | 151   152<br>GCCUGUUGA   GACAGGAGU<br>SSVYBBYCA   GRYRGWGU                |
|         | 320   321<br>AUUCUAGCU   GGUUCGGG<br>WU{0,1}WCYK{0,1}DH{0,1}VSUY   GSWYUCSRG | 287   288<br>GAGUUGCUC   AAGCUCCAA<br>RWGN{0,2}UYRCUC   RV{0,1}WVCSWSW | 243   244<br>GAGUCUUGAC   CAGCGCAGG<br>GARYCUN{0,3}HVDC   CRGCGCRGG        | 213   214<br>UUCUUCUCC   UGUUCAGCG<br>UUCUUCUCC   HGBN{1,3}VG{0,1}C{0,1}K |
| CSVd    | 45   46<br>ACCUCCUGAG   UUGAAAAGA<br>ACCCWCGYGS   TWNRVAAGA                  | 70   71<br>AAUGAGCGC   AGAAGUCCU<br>AHWNNBYBW   RBANKHYCY              | 118   119<br>GUCCGAGCAG   AUCCGCGCU<br>GTMHRCNRG   AWCYGGHU                | 152   153<br>ACUCCUGCA   GACAGGAGU<br>ACYYYYGCR   GAYDRGVST               |
|         | 307   308<br>UAUCUUCU   AGCAGCGGG<br>AYCTTCHYW   RCRRCRGG                    | 283   284<br>UGAAGCUC   ACGCUUUU<br>YRRRCYCTCA   RCRCHHHT              | 236   237<br>AGCCCGGCU   UCGAAGCU<br>ARCYCRGYY   TCRAGBYU                  | 204   205<br>UUCUUCUCC   UCGGAGGA<br>BYCCTTYCYB   TCCYGGRGV               |
| IrVd    | 35   36<br>ACCUCCAAUG   CAAAAGAA<br>ACCUCCAAWG   CA{4,5}GAA                  | 62   63<br>GGCGCGCGC   AACAAAGCU<br>GGCGCGCGC   WACAAAGCU              | 110   111<br>ACUCGCGAAG   GAGGCCUGG<br>ACUCGCGAAG   GAGGCYUGG              | 148   149<br>ACCGCGAAA   GACCGGAGA<br>ACCGCGAAA   GACCGGAGA               |
|         | 334   335<br>UCUACUUCU   GCGCGCGGG<br>UMWUYUUCU   GCGCGCGGG                  | 302   303<br>ACUGAAGCU   GAAGCGCGC<br>ACUGAAGCU   GWAGCYGCG            | 255   256<br>UCCGCGGCU   CCGCGCUGG<br>YCGCCGCUU   CCGCGCUGG                | 224   225<br>CUCACUCCG   AGCGCGGUC<br>CUCAYYGGC   AGCGCGCYC               |
| MPVd    | 48   49<br>ACCUCCAGCC   CAGGAAAAGA<br>ACCUCCGMY   CAGRAAAGA                  | 76   77<br>GGGGGCUCCG   AGGAGCGCU<br>GGCGGCGUG   AGGAGCGCU             | 123   124<br>AACUGGCAAA   GAGUUCGCG<br>AACUGGCAAA   GAGWWSGA{0,1}CG        | 149   150<br>AGUCCUCCU   GACAGGAGU<br>AGUCUYC{0,1}CA   GACAGGAGU          |
|         | 311   312<br>CUAUCUUGCU   GCGCGAGGG<br>CUAUCUUGCU   GRCKMGGG                 | 283   284<br>ACUGAAGCUC   CCGAGAAC<br>ACUGAAGCUC   CCRAGMRCC           | 237   238<br>GCCCGCCUC   CUGCGCUGU<br>GCCCGCY{1,2}CU   CU{1,2}GGCGUGU      | 211   212<br>UUCUUCUCC   UGUUGUUGA<br>UUCUUCUCC   UGY{0,1}RUGCA           |
| PCFVd   | 44   45<br>CGGAAGCGCG   CUUAGGGGA<br>CGWGGCGCG   CYUAGGGGA                   | 72   73<br>GGAAGAGCG   AUUCUUCU<br>GGAAGAGCG   AWCUCUUGU               | 119   120<br>ACCGGCGGA   GAGCGCAC<br>AYCGGCGGA   KRAYKCA{0,1}C             | 145   146<br>ACCGUUCU   GACAGGAGU<br>DCCGUUCU   GDCRGAGU                  |
|         | 307   308<br>UAUCUACU   GACGCGGCC<br>DRCUUACU   GACGYGGY                     | 279   280<br>ACUGACAGAG   GUGCUUUU<br>ACUGACAGAG   GUGCUUUU            | 232   233<br>GUCCGCGUUC   UCGCGCACU<br>GUCCGCGUUC   UCGCGCACU              | 207   208<br>UUCUUCUCC   AGUGAACCG<br>UUCYUCCUC   ARUGAACCG               |
| PolVd   | 35   36<br>ACCUCCUACU   UGCAAAAGA<br>315   316<br>CUAUCUUCU   GCGGAGCG       | 63   64<br>GGCAGCGAG   CACAAAGCU<br>285   286<br>ACUGACGCU   GUACUCGCG | 111   112<br>CUUCGCGAG   AAGGCUUGG<br>235   236<br>CCUCCGCGG   UCUUCUGCG   | 151   152<br>GCGCGUAAC   GACCUGAGA<br>207   208<br>CUCAUCGGG   AGGUGCGCG  |
| TASVd   | 46   47<br>ACCUCCAGG   CAUCAAGAA<br>ROCCUGCAGG   CAUSAAGAA                   | 73   74<br>GGCGCGGAG   AGAAGAGU<br>GGMGCSRRR   VGAAGAGU                | 119   120<br>AGGAAGUCGA   GUGCGGGGG<br>AGGAAGUCGA   GWCGGGG                | 149   150<br>UCCUUCUGA   GACAGGAGU<br>UCCYBKUGA   GACAGGAGU               |
|         | 316   317<br>UAUCUUCU   GCUUCGGG<br>YWUCUUYUU   GCUUCGGG                     | 284   285<br>ACUGAAGCU   CAACCCUCU<br>ACUGAAGCU   CVWY{3,4}MH          | 239   240<br>GGCCUCCG   CGAGCUCU<br>GGCCUCCG   CGRRGCUUC                   | 211   212<br>UUCUUCUCC   UCGCUGGAG<br>KUCCUCCUC   UCGCU{0,1}GGAR          |
| TCDVd   | 46   47<br>ACCUCCUGU   CAGAAAAGA<br>ACCUCCUGW   CAGAAAAGA                    | 74   75<br>GGCGGCUCCG   AGGAGCGCU<br>GGCGGCUCCG   AGGAGCGCU            | 121   122<br>AACUGGCAAA   AGCGCGCAG<br>AACUGGCAAA   AGCGCGCAG              | 148   149<br>UGGAAGGCG   AACAGGAGU<br>UGGAAGGCG   AACAGGAGK               |
|         | 313   314<br>CUAUCUUGCU   GCUACCGGG<br>CUAUCUUGCU   GCUUCGGG                 | 285   286<br>ACUGAAGCUC   CCGAGAAC<br>ACUGAAGCUC   CCKAGAAC            | 239   240<br>CCUCCGCCCC   UUGCGCUGU<br>CCUCCGCCCC   UUGCGCUGU              | 213   214<br>UUCUUCUCC   UCGCGGCA<br>UUCUUCUCC   UCGCGGCA                 |

**Table S6.** Nomenclature for incompletely specified bases [17].

| IUPAC nucleotide code | Base             | Mnemonic             |
|-----------------------|------------------|----------------------|
| R                     | G or A           | pu <b>R</b> ine      |
| Y                     | C or T           | p <b>Y</b> rimidine  |
| M                     | A or C           | a <b>M</b> ino group |
| K                     | G or T           | <b>K</b> eto group   |
| S                     | G or C           | <b>S</b> trong       |
| W                     | A or T           | <b>W</b> eak         |
| B                     | C or G or T      | not A                |
| D                     | A or G or T      | not C                |
| H                     | A or C or T      | not G                |
| V                     | A or C or G      | not T                |
| N                     | A or C or G or T | a <b>N</b> y         |

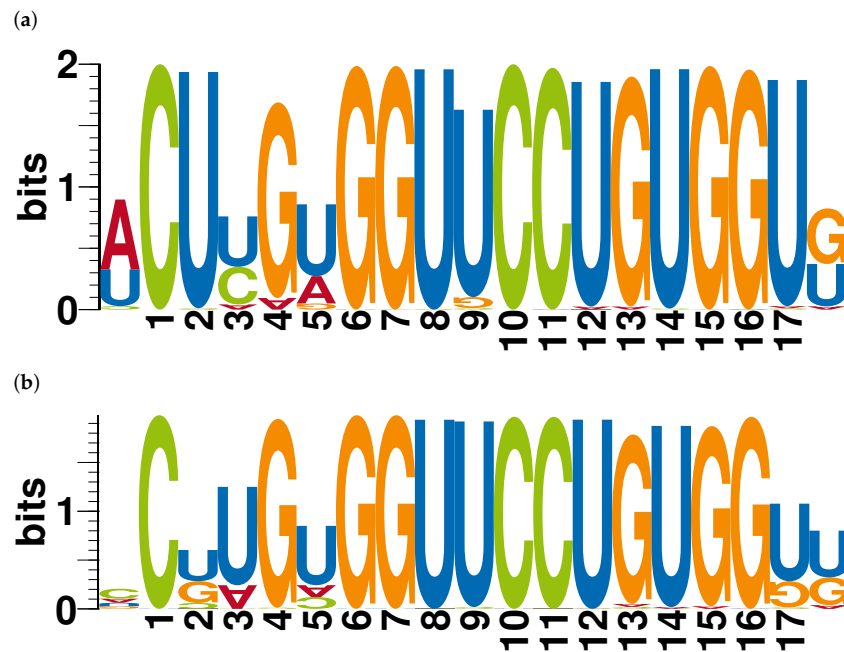

**Figure S20.** Sequence logo of “Terminal Conserved Region” (TCR).

(a) The logo is based on 912 sequences of *Pospiviroid* and CbVd-1, -2, and -6; additional four sequences contain insertions.

(b) The logo is based on 810 *Apscaviroid* sequences; additional two sequences contain an insertion.

The logo [11] was produced by the web service at <https://rth.dk/resources/slogo/>. The height of each character is proportional to its frequency.

The pattern ‘YBNRNKRBBCCNNRYRNN’ (for nucleotide ambiguity code see [17]) finds 912 TCR sequences in the 916 *Pospi-* and *Coleviroid* sequences (99.6%), as well as 786 TCR sequences in the 810 *Apscaviroid* sequences (97.0%). but finds additional false-positive hits in *Apscaviroid* sequences. The pattern has a matching probability of  $1/1214$ ; that is, a hit with this pattern is only significant in viroid sequences.

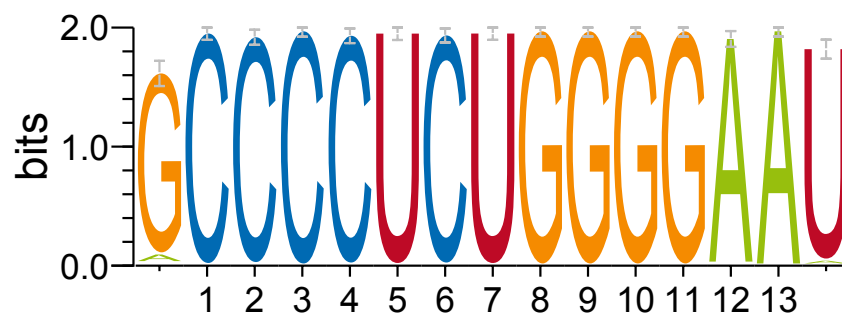

**Figure S21.** Sequence logo of “Terminal Conserved Hairpin” (TCH). The pattern ‘CCCCUCUGGGGAA’ finds 460 TCH sequences in the 484 sequences of genera CCCVd, CTiVd, CBCVd, HLVd, and HSVd (95.0%). The pattern has a matching probability of  $1/6.7 \times 10^7$ .

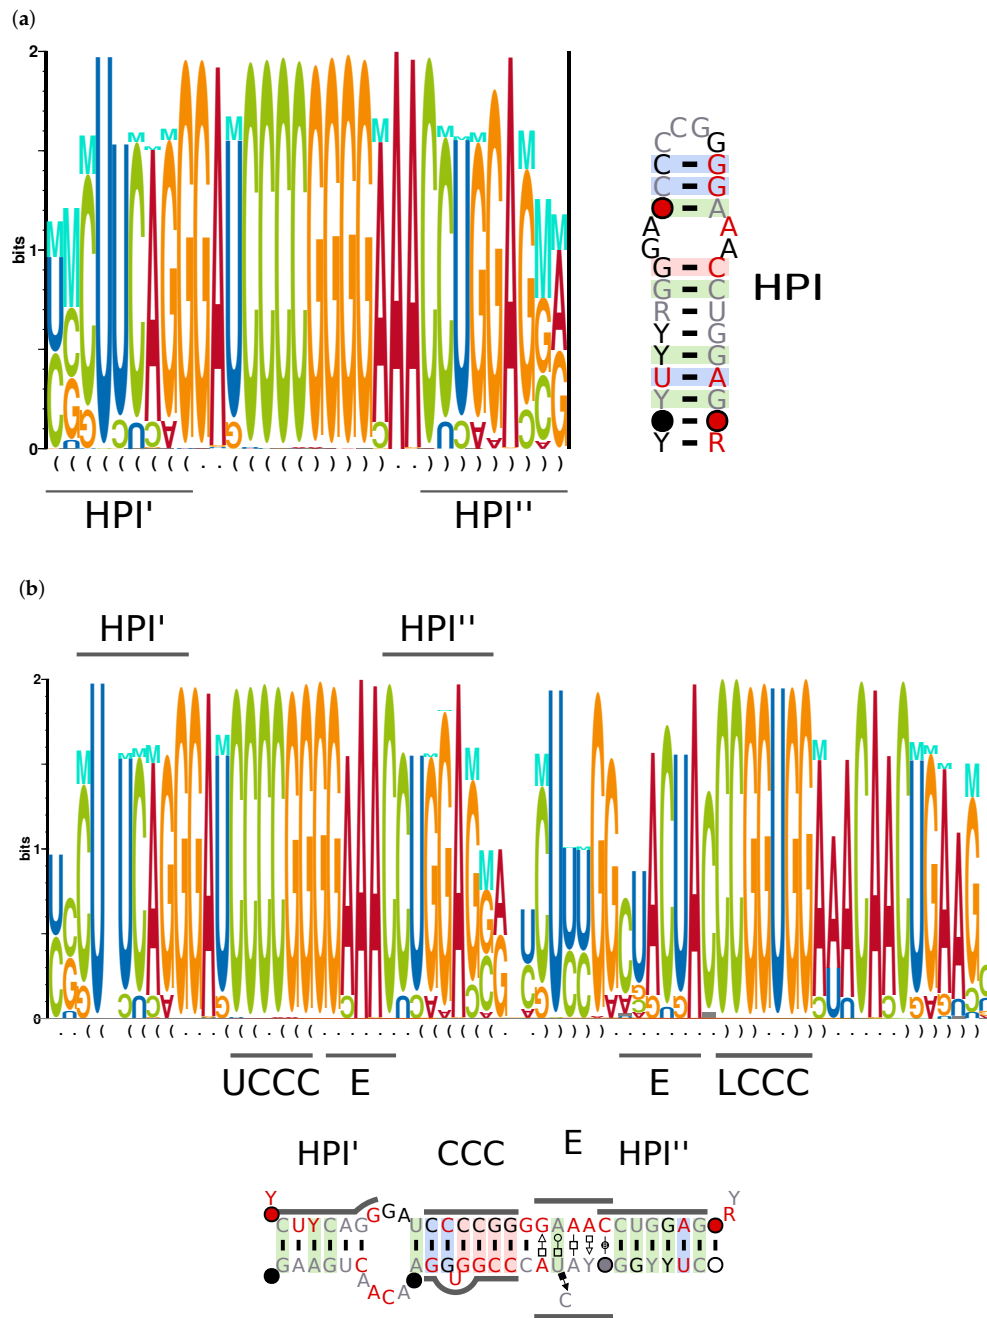

**Figure S22.** Part of central domain including hairpin I (HPI) based on an alignment of 899 *Pospiviroid* sequences.

Alignments were predicted by MAFFT X-INS-I with options `-maxiterate 1000` [6]. The logos [11] were produced by the web service at <https://rth.dk/resources/slogo/>; the height of each character is proportional to its frequency; the height of character M denotes the mutual information content of corresponding base-paired positions as depicted in bracket-dot notation at the bottom of the logo.

The consensus secondary structures were produced using CONSTRUCT [18] and R2R [19]. For a legend to the color scheme used by R2R see Figure 1.

(a) The two regions HPI' and HPI'' are located in the upper C domain (left) and form hairpin I (HPI) in metastable structures or at high temperature [20].

(b) The C domain includes the two regions HPI' and HPI'' of HPI [20], the “conserved central core” (CCC) [9], and loop E [21,22]. For loop E, the non-Watson-Crick basepairs are annotated with Leontis-Westhoff nomenclature [23,24]: *trans* Hoogsteen/sugar edge ( $\square \rightarrow$ ), *trans* Watson-Crick/Hoogsteen ( $\circ \square$ ), *cis* Hoogsteen/sugar edge ( $\blacksquare \rightarrow$ ), *trans* Hoogsteen/Hoogsteen ( $-\square-$ ), and *cis* Watson-Crick/Watson-Crick bifurcated ( $-\oplus-$ ).



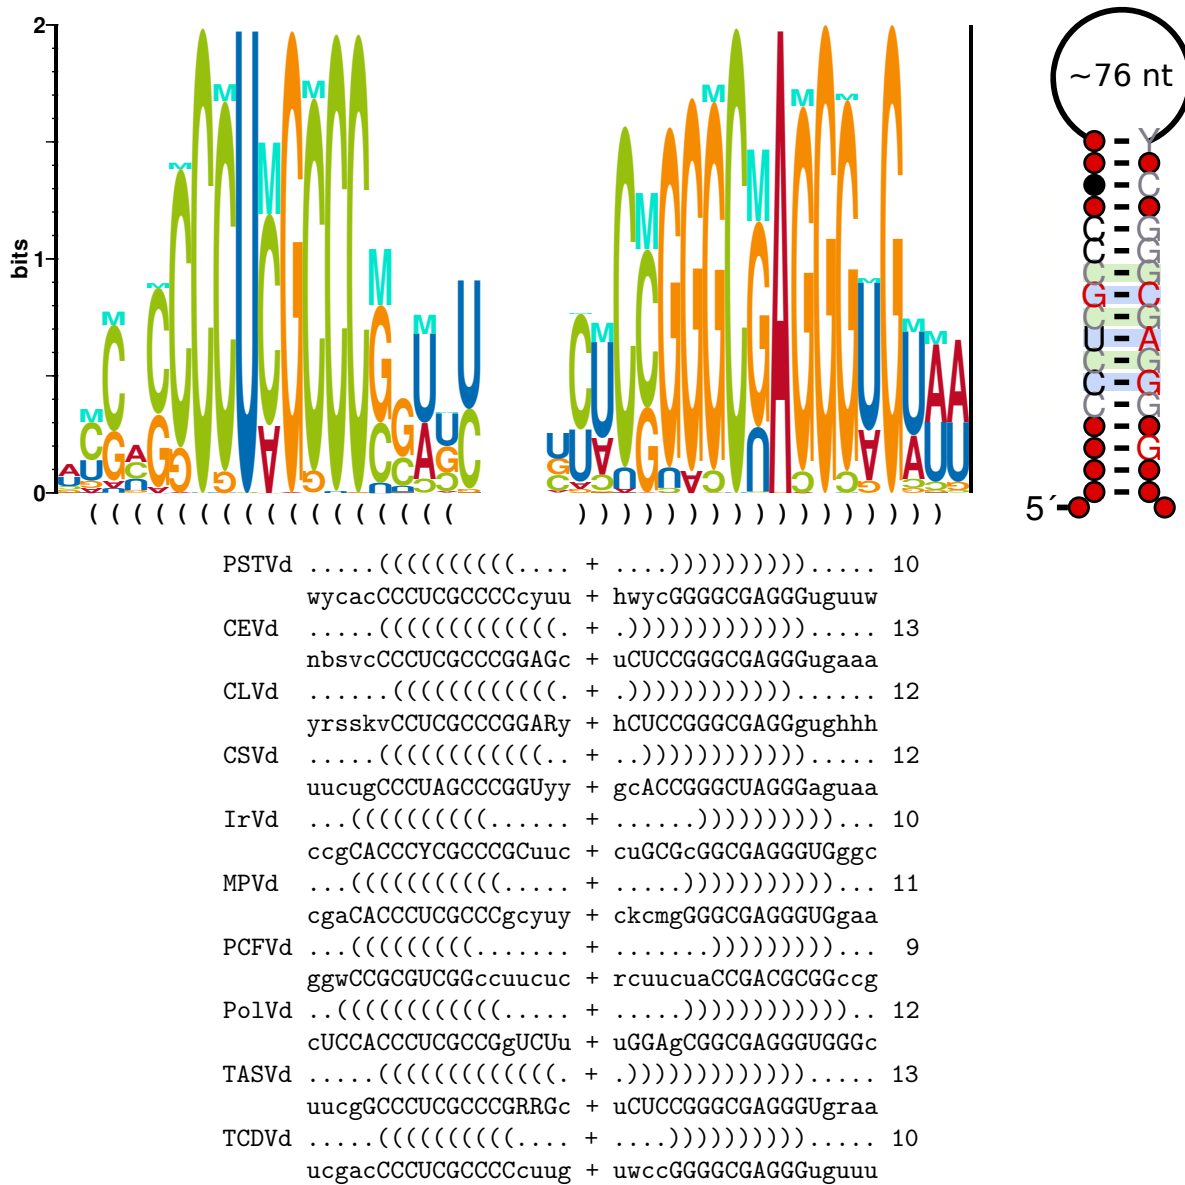

**Figure S25.** Hairpin II (HP II) of *Pospiviroid* sequences. The corresponding sequence regions of all *pospiviroid*s were aligned by hand. Top left: logo [11].

Top right: consensus sequence and consensus structure drawn by R2R [19]. The length of the hairpin loop is 65–91 nt. For the color code see Figure 1.

Bottom: consensus secondary structure in bracket-dot notation and *Pospiviroid* sequences; the number at the right side depicts the length of the hairpin helix.

The pattern “SCSUMGSCCB.\*SBVSKASKS” matches 854 of 902 *Pospiviroid* sequences (94.7%); additional 16 CEVd sequences (1.8%) receive two hits due to an ambiguity of the pattern’s 5’ part; 32 sequences (3.5%) are not matched by the pattern. For nucleotide ambiguity code see [17]; the “.” is an abbreviation for any number of nucleotides.

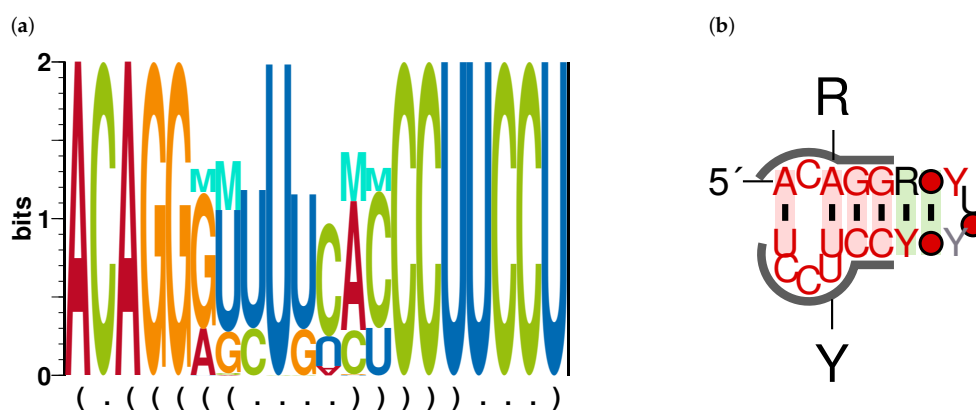

**Figure S26.** RY motif of *Pospiviroid* sequences.

(a) Logo [11].

(b) Consensus sequence and consensus structure drawn by R2R [19]. For the color code see Figure 1.

The pattern “acagg.\*?ccuuccu” matches 864 of 902 *Pospiviroid* sequences (95.8%). For nucleotide ambiguity code see [17]; the “.\*?” is an abbreviation for a minimum number of nucleotides intervening between the defined sequence stretches.

## References

1. Wilbur, W.; Lipman, D. Rapid similarity searches of nucleic acid and protein data banks. *Proc. Natl. Acad. Sci. U S A* **1983**, *80*, 726–730, [<https://doi.org/10.1073/pnas.80.3.726>].
2. Koltunow, A.; Rezaian, M. Grapevine yellow speckle viroid: structural features of a new viroid group. *Nucleic Acids Res.* **1988**, *16*, 849–864, [<https://doi.org/10.1093/nar/16.3.849>].
3. McInnes, J.; Symons, R. Comparative structure of viroids and their rapid detection using radioactive and nonradioactive nucleic acid probes. Viroids and satellites: molecular parasites at the frontier of life; Maramorosch, K., Ed. CRC Press, Florida, USA, 1991, pp. 21–58.
4. Di Serio, F.; Flores, R.; Verhoeven, J.; Li, S.; Pallás, V.; Randles, J.; Sano, T.; Vidalakis, G.; Owens, R. Current status of viroid taxonomy. *Arch. Virol.* **2014**, *159*, 3467–3478, [<https://doi.org/10.1007/s00705-014-2200-6>].
5. Chiumenti, M.; Navarro, B.; Candresse, T.; Flores, R.; Di Serio, F. Reassessing species demarcation criteria in viroid taxonomy by pairwise identity matrices. *Virus. Evol.* **2021**, *7*, veab001, [<https://doi.org/10.1093/ve/veab001>].
6. Katoh, K.; Toh, H. Improved accuracy of multiple ncRNA alignment by incorporating structural information into a MAFFT-based framework. *BMC Bioinformatics* **2008**, *9*, 212, [<https://doi.org/10.1186/1471-2105-9-212>].
7. Beitz, E. TEXshade: shading and labeling of multiple sequence alignments using LATEX2 epsilon. *Bioinformatics.* **2000**, *16*, 135–9, [<https://doi.org/10.1093/bioinformatics/16.2.135>].
8. Keese, P.; Symons, R. Molecular structure (primary and secondary). The viroids; Diener, T., Ed.; Plenum Press: New York, 1987; pp. 37–62.
9. Keese, P.; Symons, R. Domains in viroids: Evidence of intermolecular RNA rearrangement and their contribution to viroid evolution. *Proc. Natl. Acad. Sci. U S A* **1985**, *82*, 4582–4586, [<https://doi.org/10.1073/pnas.82.14.4582>].
10. Hammond, R.; Smith, D.; Diener, T. Nucleotide sequence and proposed secondary structure of *Columnea* latent viroid: a natural mosaic of viroid sequences. *Nucleic Acids Res.* **1989**, *17*, 10083–10094, [<https://doi.org/10.1093/nar/17.23.10083>].
11. Schneider, T.; Stephens, R. Sequence logos: a new way to display consensus sequences. *Nucleic Acids Res.* **1990**, *18*, 6097–6100, [<https://doi.org/10.1093/nar/18.20.6097>].
12. Koltunow, A.; Rezaian, M. A scheme for viroid classification. *Intervirology* **1989**, *30*, 194–201, [<https://doi.org/10.1159/000150093>].
13. Rezaian, M. Australian grapevine viroid—evidence for extensive recombination between viroids. *Nucleic Acids Res.* **1990**, *18*, 1813–1818, [<https://dx.doi.org/10.1093/nar/18.7.1813>].
14. Maniataki, E.; Martínez de Alba, A.; Sägeser, R.; Tabler, M.; Tsagris, M. Viroid RNA systemic spread may depend on the interaction of a 71-nucleotide bulged hairpin with the host protein VirP1. *RNA* **2003**, *9*, 346–354, [<https://doi.org/10.1261/rna.2162203>].
15. Gozmanova, M.; Denti, M.; Minkov, I.; Tsagris, M.; Tabler, M. Characterization of the RNA motif responsible for the specific interaction of potato spindle tuber viroid RNA (PSTVd) and the tomato protein Virp1. *Nucleic Acids Res.* **2003**, *31*, 5534–5543, [<https://doi.org/10.1093/nar/gkg777>].
16. Verhoeven, J.; Meekes, E.; Roenhorst, J.; Flores, R.; Serra, P. Dahlia latent viroid: a recombinant new species of the family *Pospiviroidae* posing intriguing questions about its origin and classification. *J. Gen. Virol.* **2012**, *94*, 711–719, [<https://doi.org/10.1099/vir.0.048751-0>].
17. Cornish-Bowden, A. Nomenclature for incompletely specified bases in nucleic acid sequences: recommendations 1984. *Nucleic Acids Res.* **1985**, *13*, 3021–3030, [<https://doi.org/10.1093/nar/13.9.3021>].
18. Wilm, A.; Linnenbrink, K.; Steger, G. ConStruct: Improved construction of RNA consensus structures. *BMC Bioinformatics* **2008**, *9*, 219, [<https://doi.org/10.1186/1471-2105-9-219>].
19. Weinberg, Z.; Breaker, R. R2R – software to speed the depiction of aesthetic consensus RNA secondary structures. *BMC Bioinformatics* **2011**, *12*, 3, [<https://doi.org/10.1186/1471-2105-12-3>].
20. Henco, K.; Sängler, H.; Riesner, D. Fine structure melting of viroids as studied by kinetic methods. *Nucleic Acids Res.* **1979**, *6*, 3041–3059, [<https://doi.org/10.1093/nar/6.9.3041>].
21. Branch, A.; Benenfeld, B.; Robertson, H. Ultraviolet light-induced crosslinking reveals a unique region of local tertiary structure in potato spindle tuber viroid and HeLa 5 S RNA. *Proc. Natl. Acad. Sci. U S A* **1985**, *82*, 6590–6594, [<https://doi.org/10.1073/pnas.82.19.6590>].
22. Zhong, X.; Leontis, N.; Qian, S.; Itaya, A.; Qi, Y.; Boris-Lawrie, K.; Ding, B. Tertiary structural and functional analyses of a viroid RNA motif by isostericity matrix and mutagenesis reveal its essential role in replication. *J. Virol.* **2006**, *80*, 8566–8581, [<https://doi.org/10.1128/JVI.00837-06>].
23. Leontis, N.; Westhof, E. Geometric nomenclature and classification of RNA base pairs. *RNA* **2001**, *7*, 499–512, [<https://doi.org/10.1017/s1355838201002515>].
24. Leontis, N.; Stombaugh, J.; Westhof, E. The non-Watson-Crick base pairs and their associated isostericity matrices. *Nucleic Acids Res.* **2002**, *30*, 3497–3531, [<https://doi.org/10.1093/nar/gkf481>].
